# Supplementary material for: Bioactive Bianthraquinones and Meroterpenoids from a Marine-Derived Stemphylium sp. Fungus
Source: PubMed Central journal article supplement (PMC7551059; doi:10.3390/md18090436), 2020-08-21
Supplement: marinedrugs-18-00436-s001.pdf [file marinedrugs-18-00436-s001.pdf]

## **Supporting Information**

### **Bioactive Bianthraquinones and Meroterpenoids from a Marine Sponge-Derived *Stemphylium* sp. Fungus**

Ji-Yeon Hwang,<sup>1</sup> Sung Chul Park,<sup>1</sup> Woong Sub Byun,<sup>1</sup> Dong-Chan Oh,<sup>1</sup> Sang Kook Lee,<sup>1</sup>

Ki-Bong Oh,<sup>2,\*</sup> and Jongheon Shin<sup>1,\*</sup>

<sup>1</sup>*Natural Products Research Institute, College of Pharmacy, Seoul National University, San 56-1,*

*Sillim, Gwanak, Seoul 151-742, Korea*

<sup>2</sup>*Department of Agricultural Biotechnology, College of Agricultural and Life Science, Seoul National*

*University, San 56-1, Sillim, Gwanak, Seoul 151-921, Korea*

## List of Supporting Information

|            |                                                                                                   |     |
|------------|---------------------------------------------------------------------------------------------------|-----|
| Figure S1  | The <sup>1</sup> H NMR spectrum of Alterporriol Z1 (1) (600MHz, CD <sub>3</sub> OD).....          | S4  |
| Figure S2  | The <sup>13</sup> C NMR spectrum of Alterporriol Z1 (1) (150MHz, CD <sub>3</sub> OD).....         | S4  |
| Figure S3  | The HSQC spectrum of Alterporriol Z1 (1) (600MHz, CD <sub>3</sub> OD).....                        | S5  |
| Figure S4  | The COSY spectrum of Alterporriol Z1 (1) (600MHz, CD <sub>3</sub> OD).....                        | S5  |
| Figure S5  | The HMBC spectrum of Alterporriol Z1 (1) (600MHz, CD <sub>3</sub> OD).....                        | S6  |
| Figure S6  | The LR-HSQMBC spectrum of Alterporriol Z1 (1) (800MHz, CD <sub>3</sub> OD).....                   | S6  |
| Figure S7  | The NOESY spectrum of Alterporriol Z1 (1) (400MHz, CD <sub>3</sub> OD).....                       | S7  |
| Figure S8  | The <sup>1</sup> H NMR spectrum of Alterporriol Z1 (1) (800MHz, THF- <i>d</i> <sub>8</sub> )..... | S7  |
| Figure S9  | The NOESY spectrum of Alterporriol Z1 (1) (800MHz, THF- <i>d</i> <sub>8</sub> ).....              | S8  |
| Figure S10 | The HRFABMS data of Alterporriol Z1 (1).....                                                      | S8  |
| Figure S11 | The <sup>1</sup> H NMR spectrum of Alterporriol Z2 (2) (400MHz, CD <sub>3</sub> OD).....          | S9  |
| Figure S12 | The <sup>13</sup> C NMR spectrum of Alterporriol Z2 (2) (100MHz, CD <sub>3</sub> OD).....         | S9  |
| Figure S13 | The HSQC spectrum of Alterporriol Z2 (2) (400MHz, CD <sub>3</sub> OD).....                        | S10 |
| Figure S14 | The COSY spectrum of Alterporriol Z2 (2) (400MHz, CD <sub>3</sub> OD).....                        | S10 |
| Figure S15 | The HMBC spectrum of Alterporriol Z2 (2) (400MHz, CD <sub>3</sub> OD).....                        | S11 |
| Figure S16 | The NOESY spectrum of Alterporriol Z2 (2) (400MHz, CD <sub>3</sub> OD).....                       | S11 |
| Figure S17 | The HRFABMS data of Alterporriol Z2 (2).....                                                      | S12 |
| Figure S18 | The <sup>1</sup> H NMR spectrum of Alterporriol Z3 (3) (800MHz, CD <sub>3</sub> OD).....          | S13 |
| Figure S19 | The <sup>13</sup> C NMR spectrum of Alterporriol Z3 (3) (200MHz, CD <sub>3</sub> OD).....         | S13 |
| Figure S20 | The HSQC spectrum of Alterporriol Z3 (3) (500MHz, CD <sub>3</sub> OD).....                        | S14 |
| Figure S21 | The COSY spectrum of Alterporriol Z3 (3) (500MHz, CD <sub>3</sub> OD).....                        | S14 |
| Figure S22 | The HMBC spectrum of Alterporriol Z3 (3) (800MHz, CD <sub>3</sub> OD).....                        | S15 |
| Figure S23 | The NOESY spectrum of Alterporriol Z3 (3) (500MHz, CD <sub>3</sub> OD).....                       | S15 |
| Figure S24 | The HRFABMS data of Alterporriol Z3 (3).....                                                      | S16 |
| Figure S25 | The <sup>1</sup> H NMR spectrum of Tricycloalterfurene E (7) (800MHz, CD <sub>3</sub> OD).....    | S17 |
| Figure S26 | The <sup>13</sup> C NMR spectrum of Tricycloalterfurene E (7) (100MHz, CD <sub>3</sub> OD).....   | S17 |
| Figure S27 | The HSQC spectrum of Tricycloalterfurene E (7) (400MHz, CD <sub>3</sub> OD).....                  | S18 |
| Figure S28 | The COSY spectrum of Tricycloalterfurene E (7) (400MHz, CD <sub>3</sub> OD).....                  | S18 |
| Figure S29 | The HMBC spectrum of Tricycloalterfurene E (7) (800MHz, CD <sub>3</sub> OD).....                  | S19 |
| Figure S30 | The NOESY spectrum of Tricycloalterfurene E (7) (600MHz, CD <sub>3</sub> OD).....                 | S19 |
| Figure S31 | The HRFABMS data of Tricycloalterfurene E (7).....                                                | S20 |
| Figure S32 | The <sup>1</sup> H NMR spectrum of Tricycloalterfurene F (8) (800MHz, CD <sub>3</sub> OD).....    | S21 |
| Figure S33 | The <sup>13</sup> C NMR spectrum of Tricycloalterfurene F (8) (100MHz, CD <sub>3</sub> OD).....   | S21 |
| Figure S34 | The HSQC spectrum of Tricycloalterfurene F (8) (800MHz, CD <sub>3</sub> OD).....                  | S22 |
| Figure S35 | The COSY spectrum of Tricycloalterfurene F (8) (800MHz, CD <sub>3</sub> OD).....                  | S22 |
| Figure S36 | The HMBC spectrum of Tricycloalterfurene F (8) (800MHz, CD <sub>3</sub> OD).....                  | S23 |
| Figure S37 | The NOESY spectrum of Tricycloalterfurene F (8) (800MHz, CD <sub>3</sub> OD).....                 | S23 |
| Figure S38 | The HRFABMS data of Tricycloalterfurene F (8).....                                                | S24 |
| Figure S39 | The <sup>1</sup> H NMR spectrum of Tricycloalterfurene G (9) (500MHz, CD <sub>3</sub> OD).....    | S25 |
| Figure S40 | The <sup>13</sup> C NMR spectrum of Tricycloalterfurene G (9) (100MHz, CD <sub>3</sub> OD).....   | S25 |
| Figure S41 | The HSQC spectrum of Tricycloalterfurene G (9) (500MHz, CD <sub>3</sub> OD).....                  | S26 |
| Figure S42 | The COSY spectrum of Tricycloalterfurene G (9) (400MHz, CD <sub>3</sub> OD).....                  | S26 |
| Figure S43 | The HMBC spectrum of Tricycloalterfurene G (9) (400MHz, CD <sub>3</sub> OD).....                  | S27 |
| Figure S44 | The NOESY spectrum of Tricycloalterfurene G (9) (400MHz, CD <sub>3</sub> OD).....                 | S27 |
| Figure S45 | The HRFABMS data of Tricycloalterfurene G (9).....                                                | S28 |
| Figure S46 | The <sup>1</sup> H NMR spectrum of ( <i>S</i> )-MTPA Ester of 7 (800MHz, CD <sub>3</sub> OD)..... | S29 |
| Figure S47 | The <sup>1</sup> H NMR spectrum of ( <i>R</i> )-MTPA Ester of 7 (800MHz, CD <sub>3</sub> OD)..... | S29 |

|            |                                                                                                                                                    |     |
|------------|----------------------------------------------------------------------------------------------------------------------------------------------------|-----|
| Figure S48 | The <sup>1</sup> H NMR spectrum of ( <i>S</i> )-MTPA Ester of <b>8</b> (800MHz, CD <sub>3</sub> OD)-----                                           | S30 |
| Figure S49 | The <sup>1</sup> H NMR spectrum of ( <i>R</i> )-MTPA Ester of <b>8</b> (800MHz, CD <sub>3</sub> OD)-----                                           | S30 |
| Figure S50 | The <sup>1</sup> H NMR spectrum of ( <i>S</i> )-PGME Amide of <b>7</b> (800MHz, CD <sub>3</sub> OD)-----                                           | S31 |
| Figure S51 | The <sup>1</sup> H NMR spectrum of ( <i>R</i> )-PGME Amide of <b>7</b> (800MHz, CD <sub>3</sub> OD)-----                                           | S31 |
| Figure S52 | The <sup>1</sup> H NMR spectrum of ( <i>S</i> )-PGME Amide of <b>8</b> (800MHz, CD <sub>3</sub> OD)-----                                           | S32 |
| Figure S53 | The <sup>1</sup> H NMR spectrum of ( <i>R</i> )-PGME Amide of <b>8</b> (800MHz, CD <sub>3</sub> OD)-----                                           | S32 |
| Figure S54 | The results of DP4 analyses of Alterporriol Z1 ( <b>1</b> )-----                                                                                   | S33 |
| Figure S55 | The viability of RAW 264.7 cells was measured using the MTT assay-----                                                                             | S34 |
| Table S1   | Experimental (Exp.) and calculated (Cal.) chemical shift values of enantiomers A and B on aliphatic ring part of Alterporriol Z1 ( <b>1</b> )----- | S35 |
| Table S2   | The <sup>1</sup> H NMR Data of Alterporriol Z1 ( <b>1</b> ) in THF- <i>d</i> <sub>8</sub> -----                                                    | S36 |

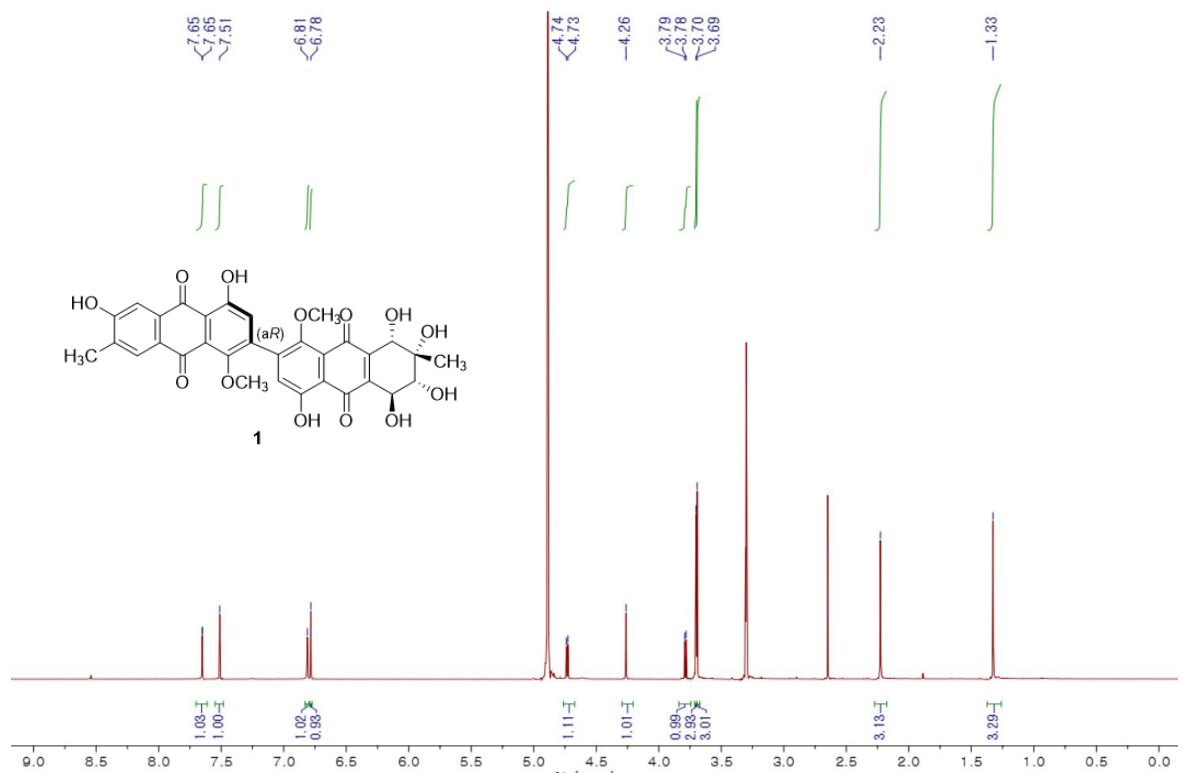

**Figure S1.** The <sup>1</sup>H NMR spectrum of Alterporriol Z1 (**1**) (600MHz, CD<sub>3</sub>OD)

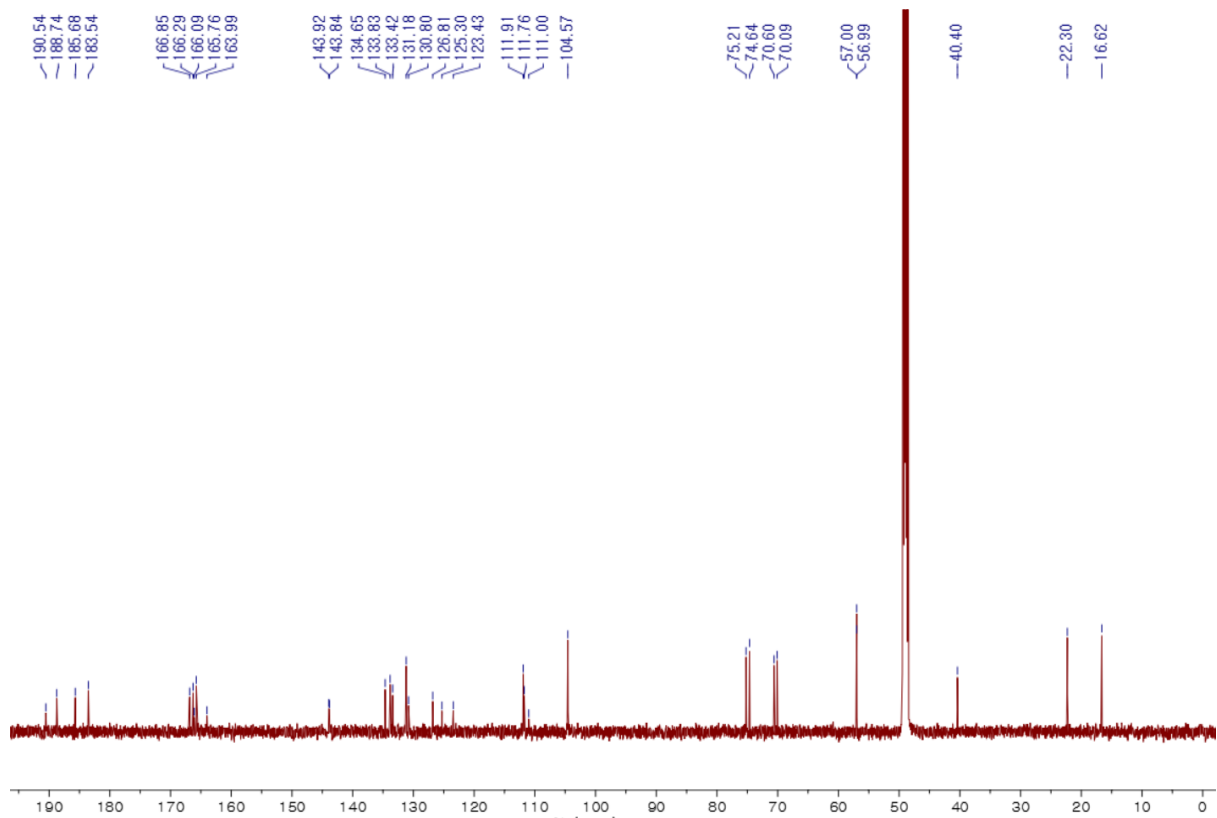

**Figure S2.** The <sup>13</sup>C NMR spectrum of Alterporriol Z1 (**1**) (150MHz, CD<sub>3</sub>OD)

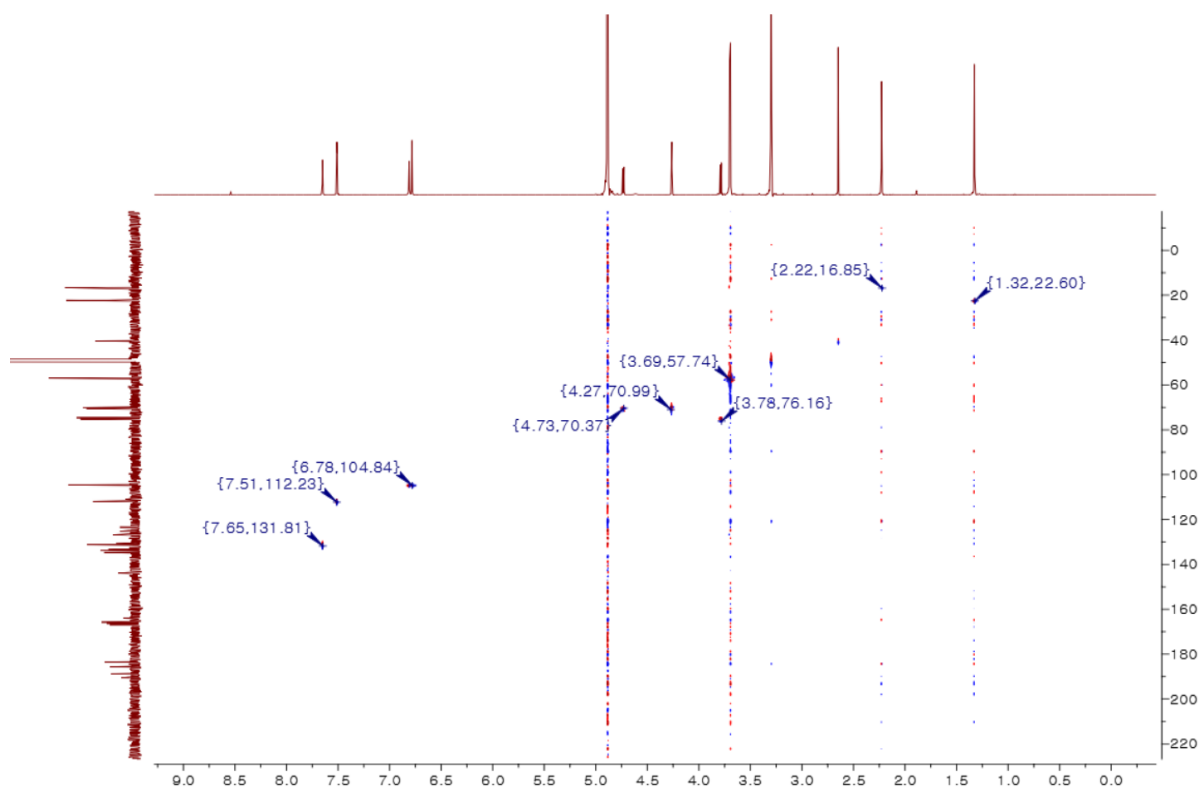

**Figure S3.** The HSQC spectrum of Alterporriol Z1 (**1**) (600MHz, CD<sub>3</sub>OD)

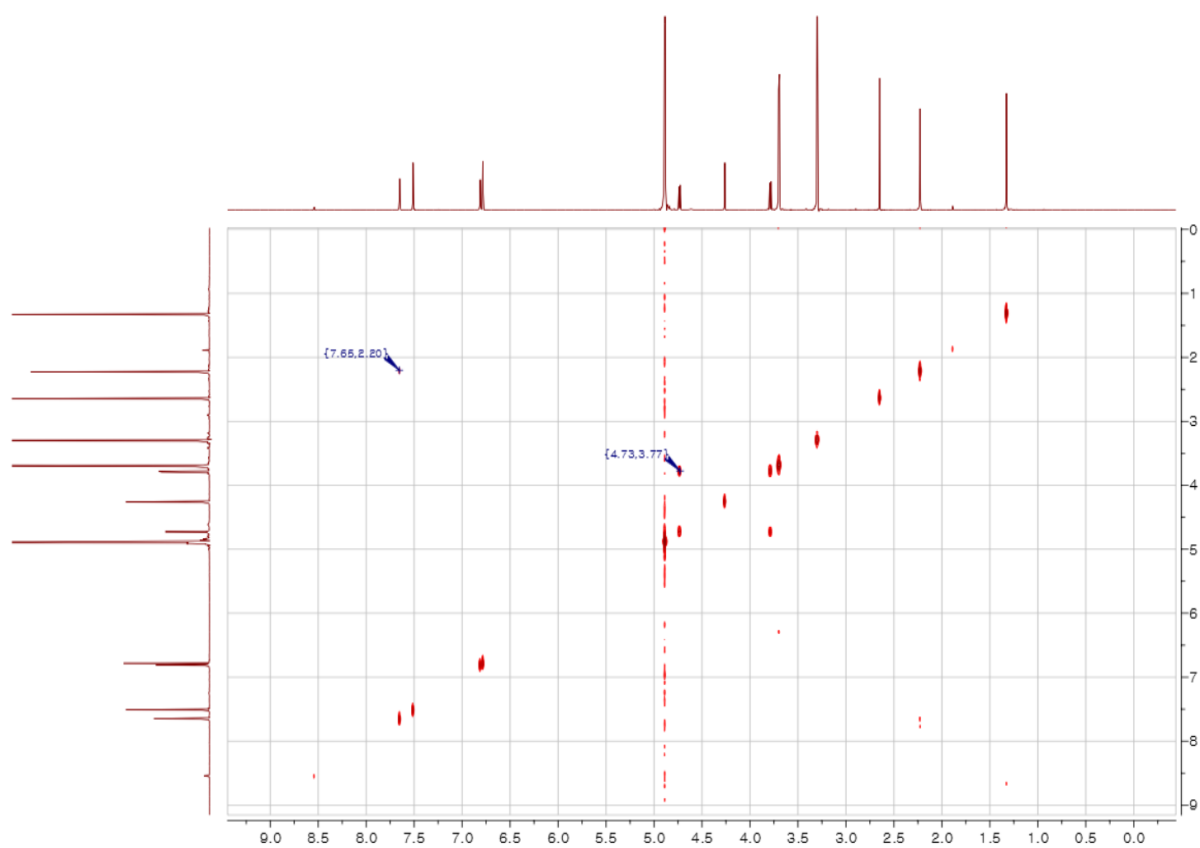

**Figure S4.** The COSY spectrum of Alterporriol Z1 (**1**) (600MHz, CD<sub>3</sub>OD)

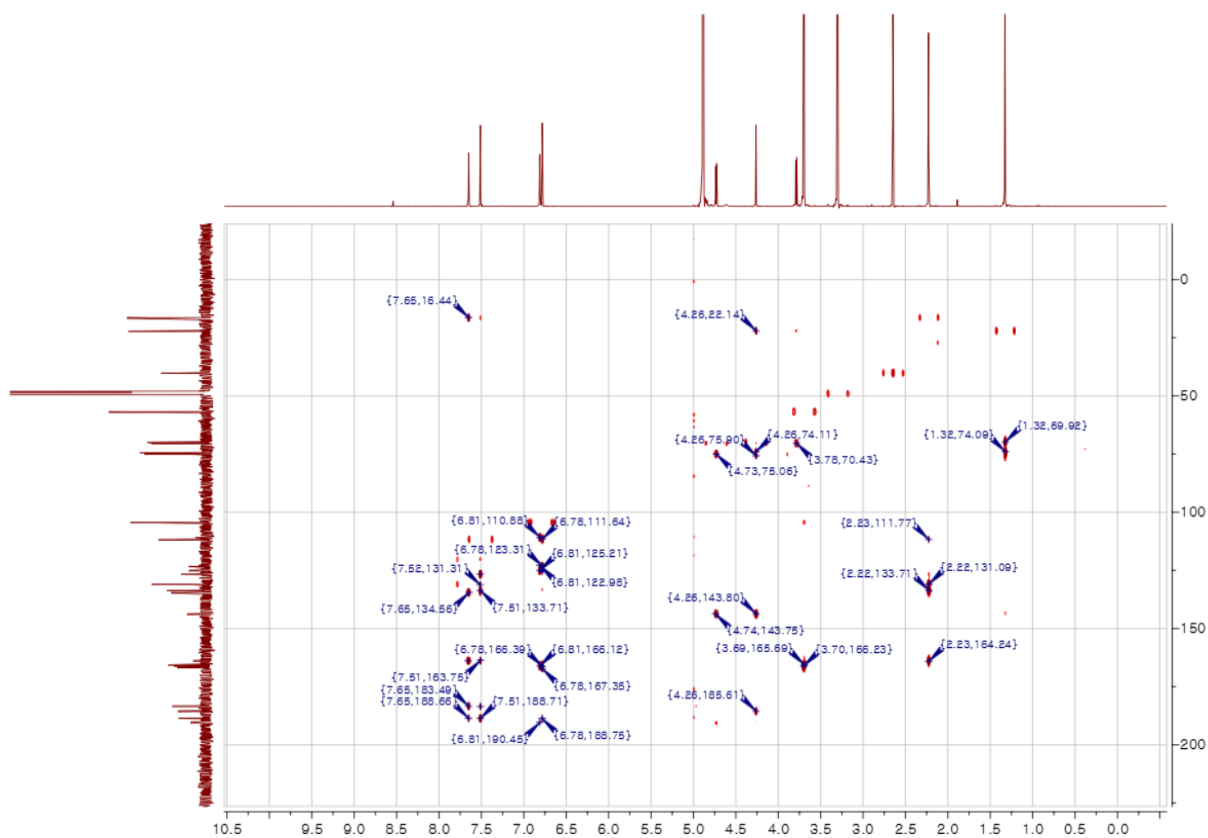

**Figure S5.** The HMBC spectrum of Alterporriol Z1 (1) (600MHz, CD<sub>3</sub>OD)

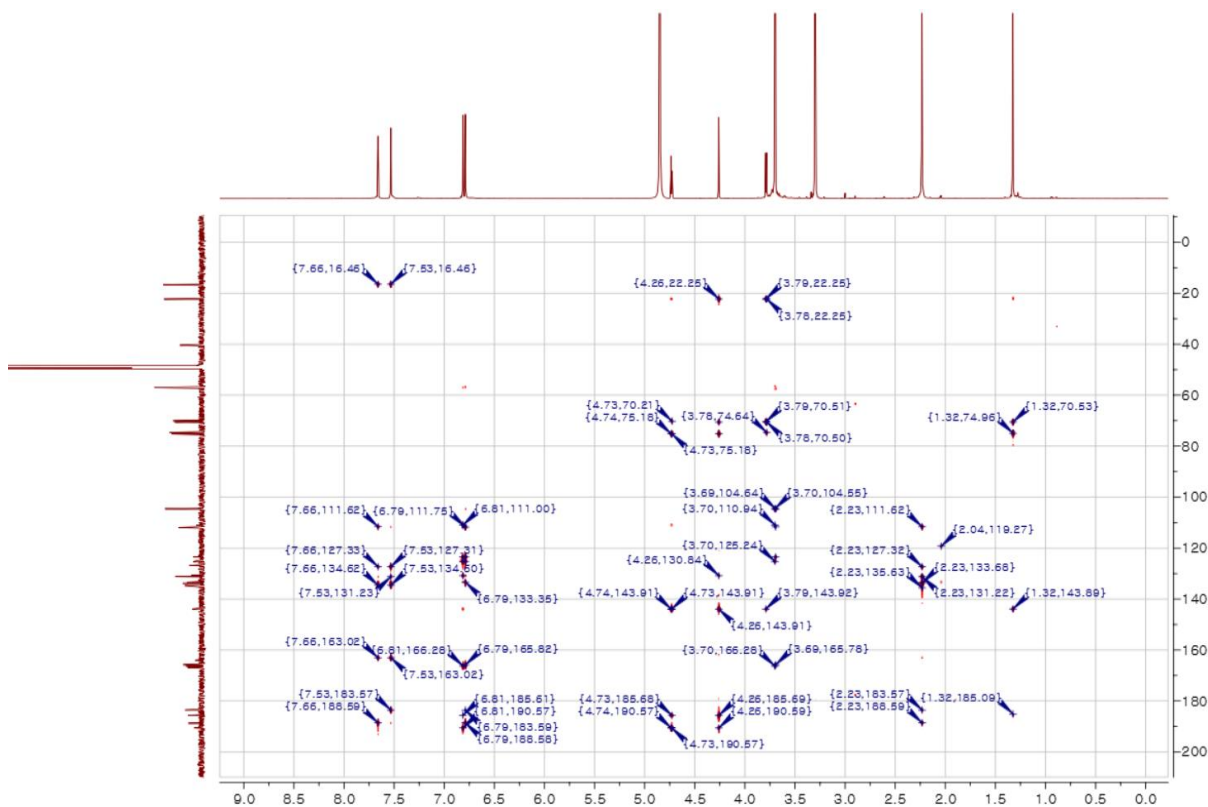

**Figure S6.** The LR-HSQMBC spectrum of Alterporriol Z1 (1) (800MHz, CD<sub>3</sub>OD)

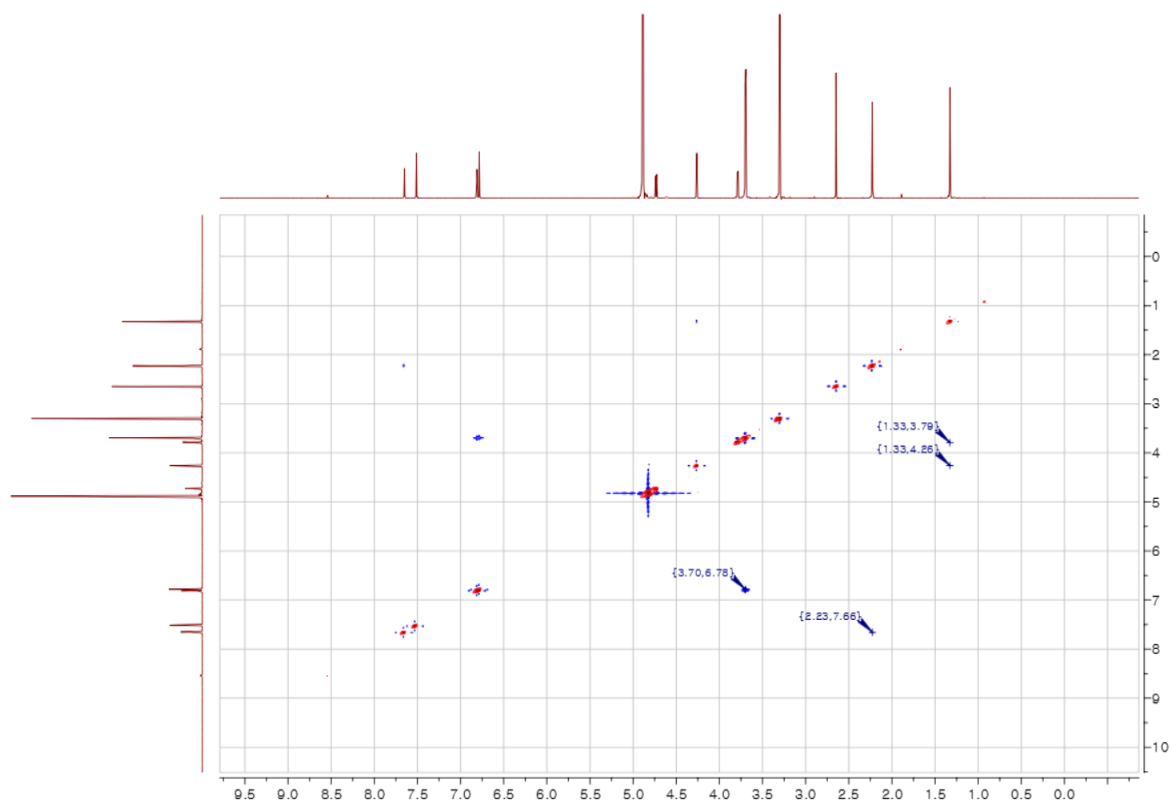

**Figure S7.** The NOESY spectrum of Alterporriol Z1 (**1**) (400MHz, CD<sub>3</sub>OD)

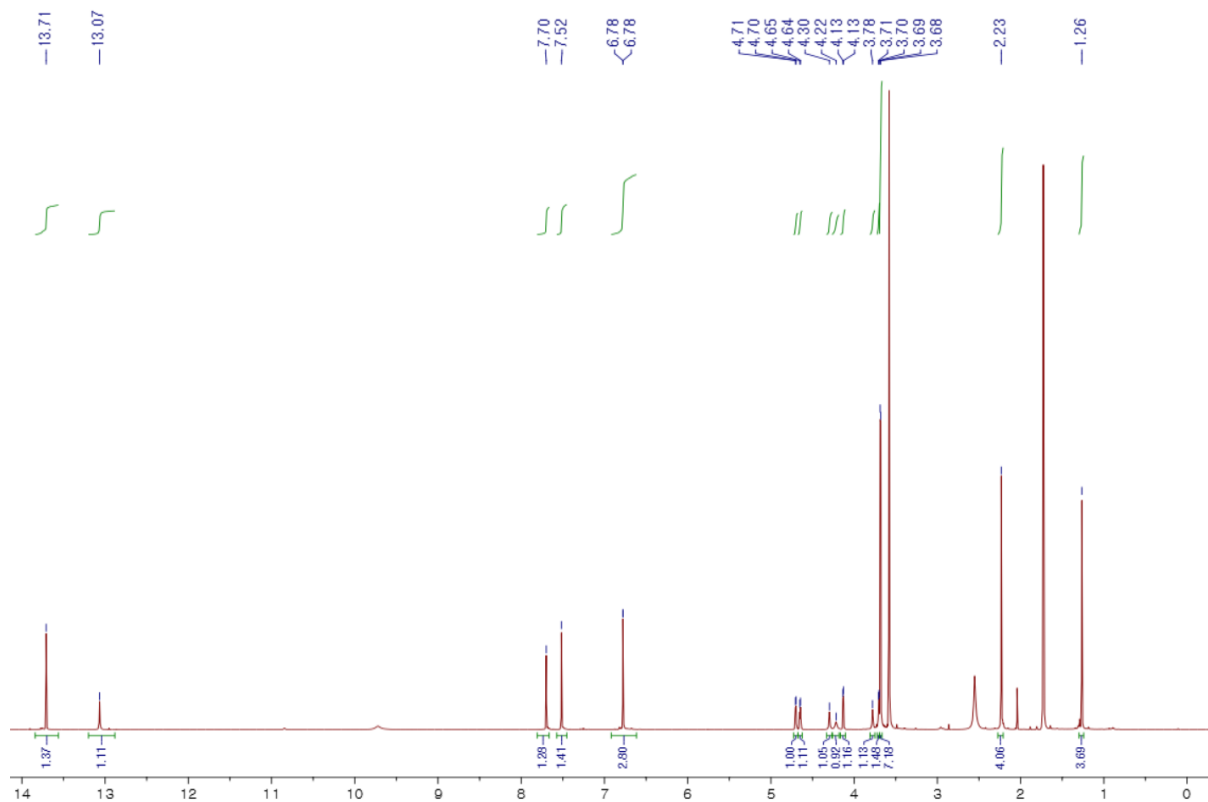

**Figure S8.** The <sup>1</sup>H NMR spectrum of Alterporriol Z1 (**1**) (800MHz, THF-*d*<sub>8</sub>)

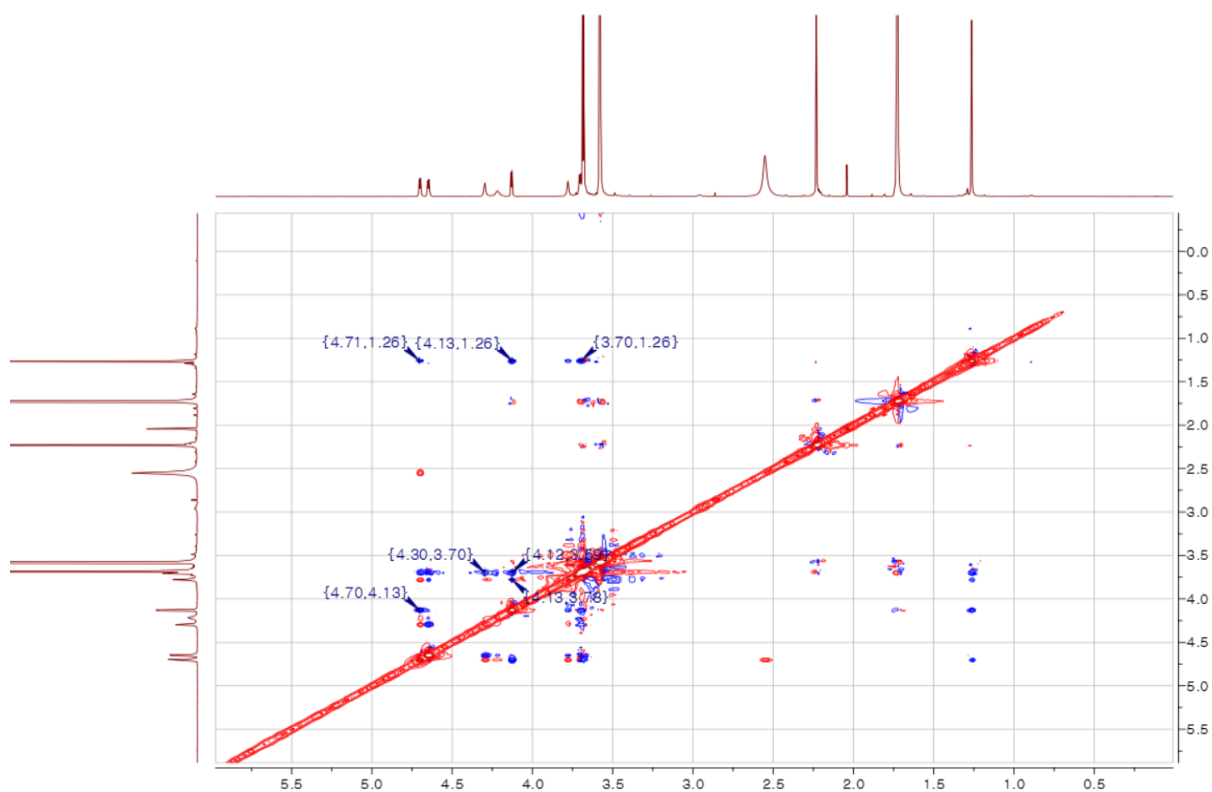

**Figure S9.** The NOESY spectrum of Alterporriol Z1 (**1**) (800MHz, THF-*d*<sub>8</sub>)

[ Elemental Composition ] Page: 1

Data : HJH-1-C32H26O13 Date : 24-Oct-2016 15:29  
 Sample: -  
 Note: -  
 Inlet : Direct Ion Mode : FAB+  
 RT : 0.43 min Scan#: (9,10)  
 Elements : C 32/0, H 27/0, O 13/0, Na 1/0  
 Mass Tolerance : 1mmu  
 Unsaturation (U.S.) : -0.5 - 100.0

| Observed m/z | Int%  | Err[ppm / mmu] | U.S. | Composition       |
|--------------|-------|----------------|------|-------------------|
| 581.3657     | 76.2  |                |      |                   |
| 618.1377     | 36.4  | +0.6 / +0.4    | 20.0 | C 32 H 26 O 13    |
| 619.1449     | 100.0 | -0.4 / -0.3    | 19.5 | C 32 H 27 O 13    |
| 620.1522     | 52.6  |                |      |                   |
| 621.1547     | 15.2  |                |      |                   |
| 625.3936     | 69.7  |                |      |                   |
| 641.1275     | 62.5  | +0.6 / +0.4    | 19.5 | C 32 H 26 O 13 Na |
| 642.1318     | 29.7  |                |      |                   |
| 670.4144     | 15.6  |                |      |                   |

[ Theoretical Ion Distribution ] Page: 1

Molecular Formula : C32 H27 O13  
 (m/z 619.1452, MW 619.5586, U.S. 19.5)  
 Base Peak : 619.1452, Averaged MW : 619.5554(a), 619.5562(w)

| m/z      | INT.           |
|----------|----------------|
| 619.1452 | 100.0000 ***** |
| 620.1485 | 36.0867 *****  |
| 621.1512 | 8.9194 *****   |
| 622.1539 | 1.6527 *       |
| 623.1564 | 0.2540         |
| 624.1589 | 0.0335         |
| 625.1614 | 0.0039         |
| 626.1639 | 0.0004         |

**Figure S10.** The HRFABMS data of Alterporriol Z1 (**1**)



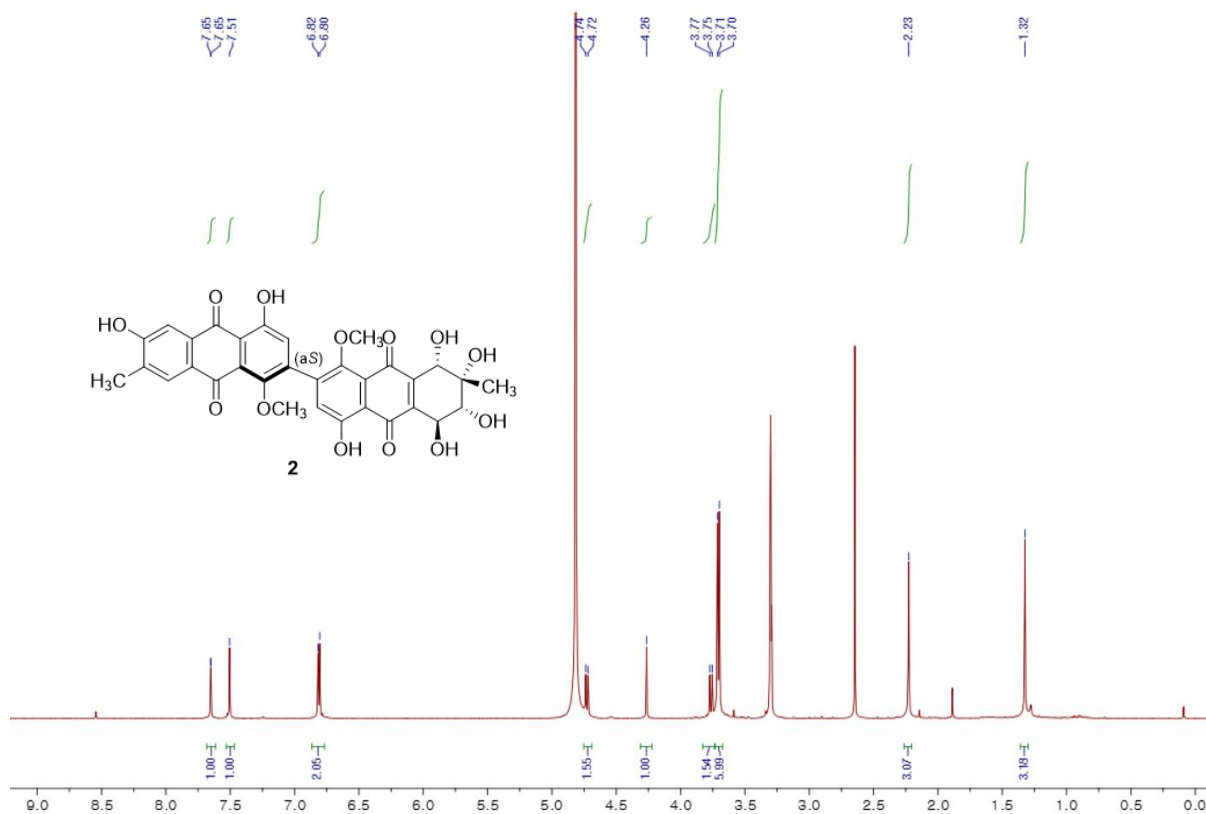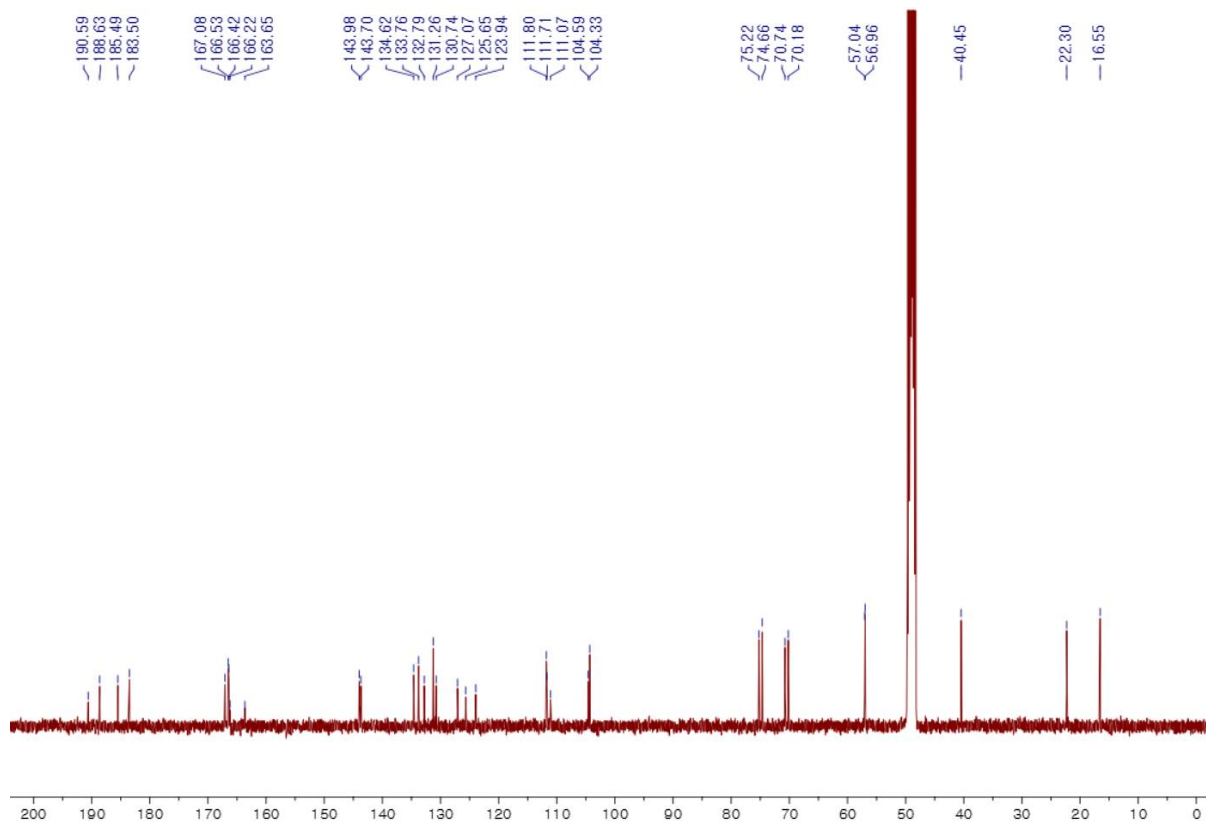

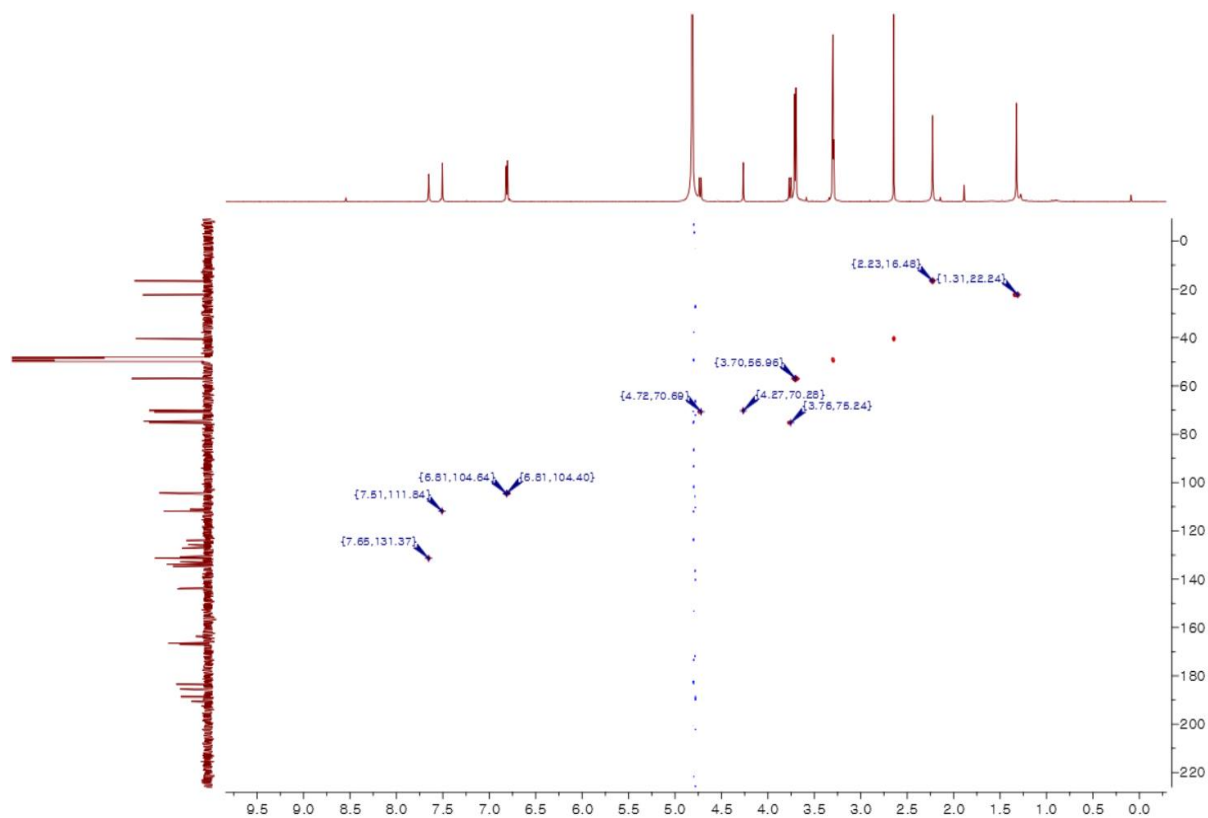

**Figure S13.** The HSQC spectrum of Alterporriol Z2 (**2**) (400MHz, CD<sub>3</sub>OD)

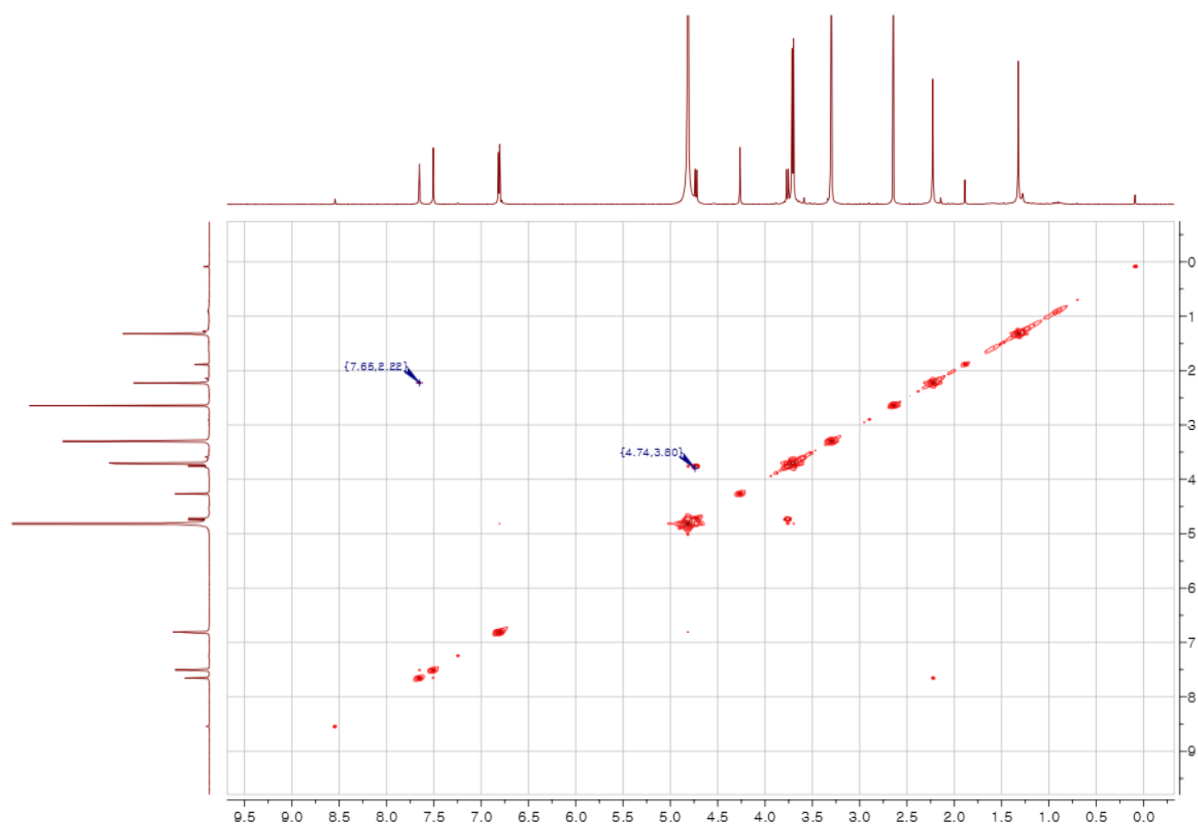

**Figure S14.** The COSY spectrum of Alterporriol Z2 (**2**) (400MHz, CD<sub>3</sub>OD)

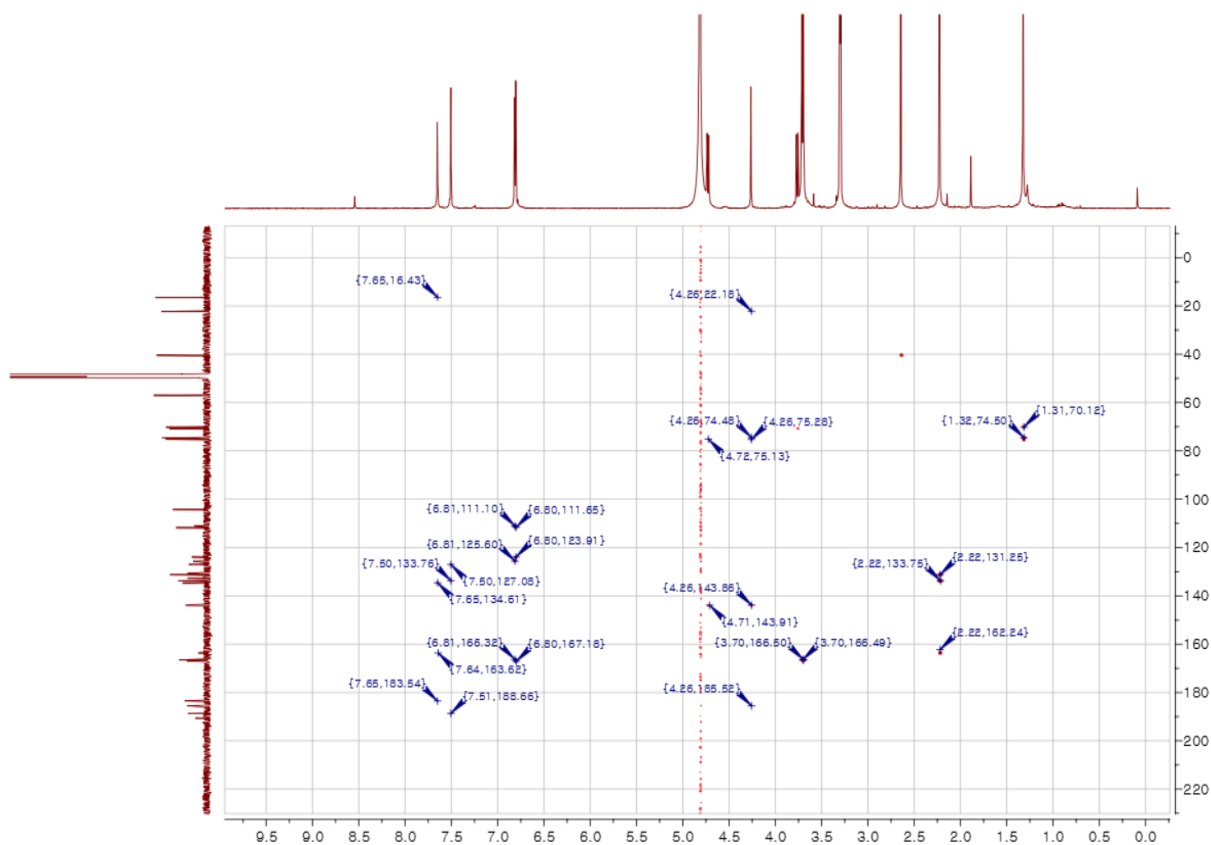

**Figure S15.** The HMBC spectrum of Alterporriol Z2 (**2**) (400MHz, CD<sub>3</sub>OD)

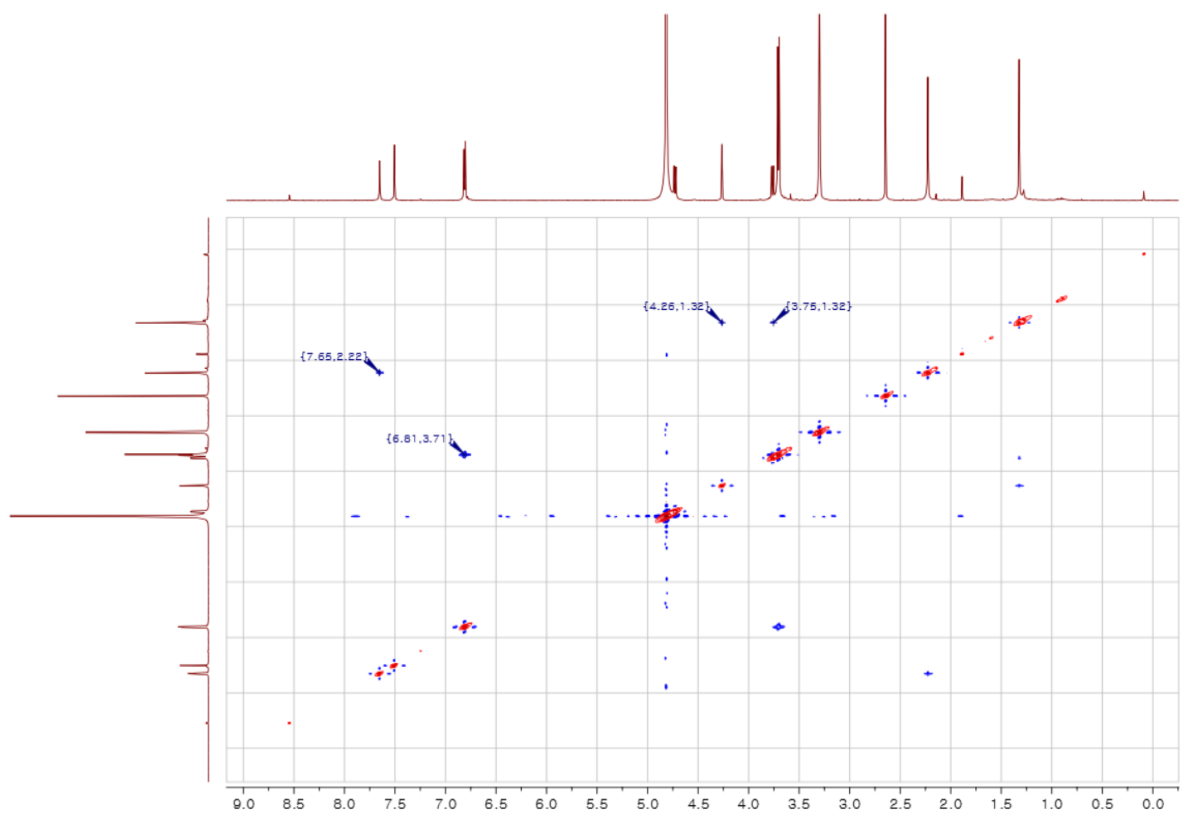

**Figure S16.** The NOESY spectrum of Alterporriol Z2 (**2**) (400MHz, CD<sub>3</sub>OD)

[ Elemental Composition ]

Page: 1

Data : HJH-2-C32H26O13 Date : 24-Oct-2016 13:52  
 Sample: -  
 Note : -  
 Inlet : Direct Ion Mode : FAB+  
 RT : 0.18 min Scan#: (4,5)  
 Elements : C 32/0, H 27/0, O 13/0, Na 1/0  
 Mass Tolerance : 1000ppm, 1mmu if m/z < 1, 2mmu if m/z > 2  
 Unsaturation (U.S.) : -0.5 - 100.0

| Observed m/z | Int%  | Err[ppm / mmu] | U.S. | Composition       |
|--------------|-------|----------------|------|-------------------|
| 581.3678     | 100.0 |                |      |                   |
| 618.1376     | 11.4  | +0.4 / +0.2    | 20.0 | C 32 H 26 O 13    |
| 619.1454     | 30.8  | +0.4 / +0.2    | 19.5 | C 32 H 27 O 13    |
| 620.1486     | 16.6  |                |      |                   |
| 625.3922     | 27.7  |                |      |                   |
| 641.1267     | 20.8  | -0.6 / -0.4    | 19.5 | C 32 H 26 O 13 Na |

[ Theoretical Ion Distribution ]

Page: 1

Molecular Formula : C32 H27 O13  
 (m/z 619.1452, MW 619.5586, U.S. 19.5)  
 Base Peak : 619.1452, Averaged MW : 619.5554(a), 619.5562(w)

| m/z      | INT.     |       |
|----------|----------|-------|
| 619.1452 | 100.0000 | ***** |
| 620.1485 | 36.0867  | ***** |
| 621.1512 | 8.9194   | ***** |
| 622.1539 | 1.6527   | *     |
| 623.1564 | 0.2540   |       |
| 624.1589 | 0.0335   |       |
| 625.1614 | 0.0039   |       |
| 626.1639 | 0.0004   |       |

**Figure S17.** The HRFABMS data of Alterporriol Z2 (2)

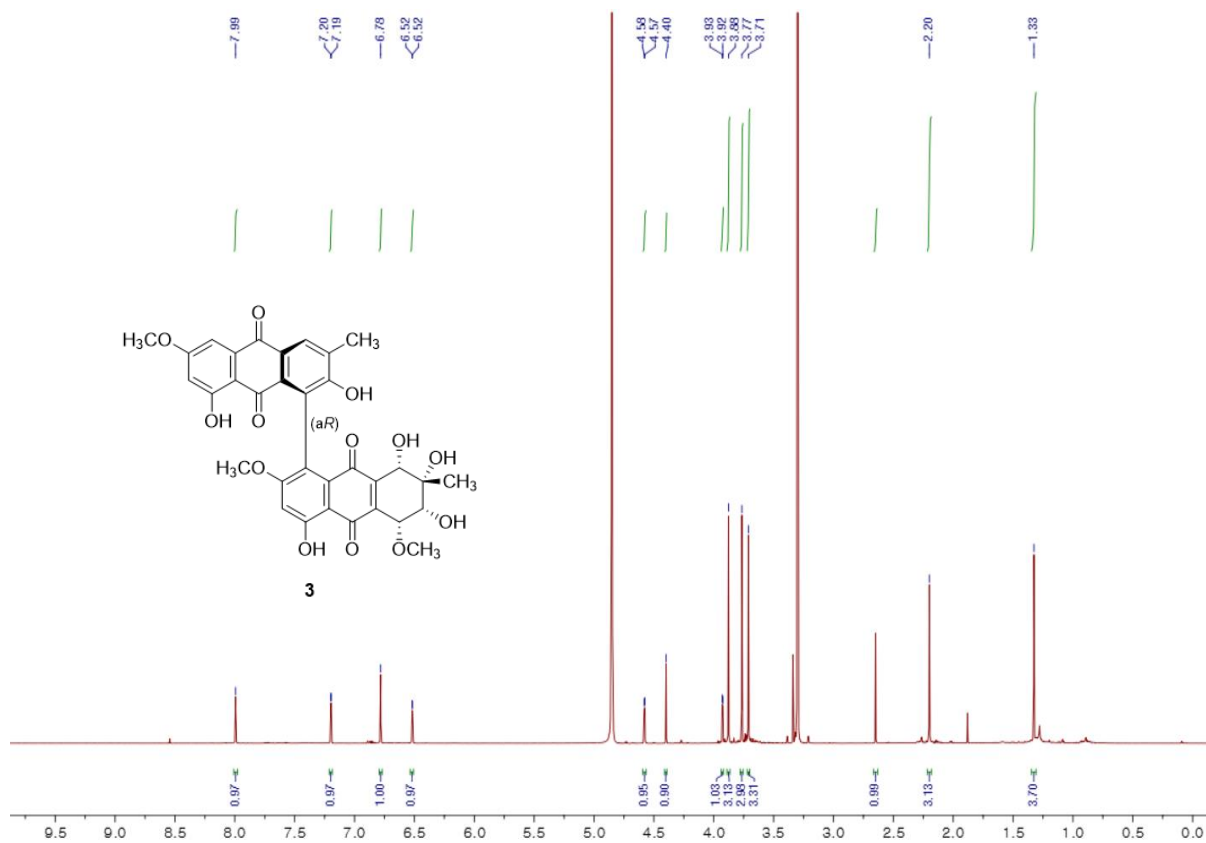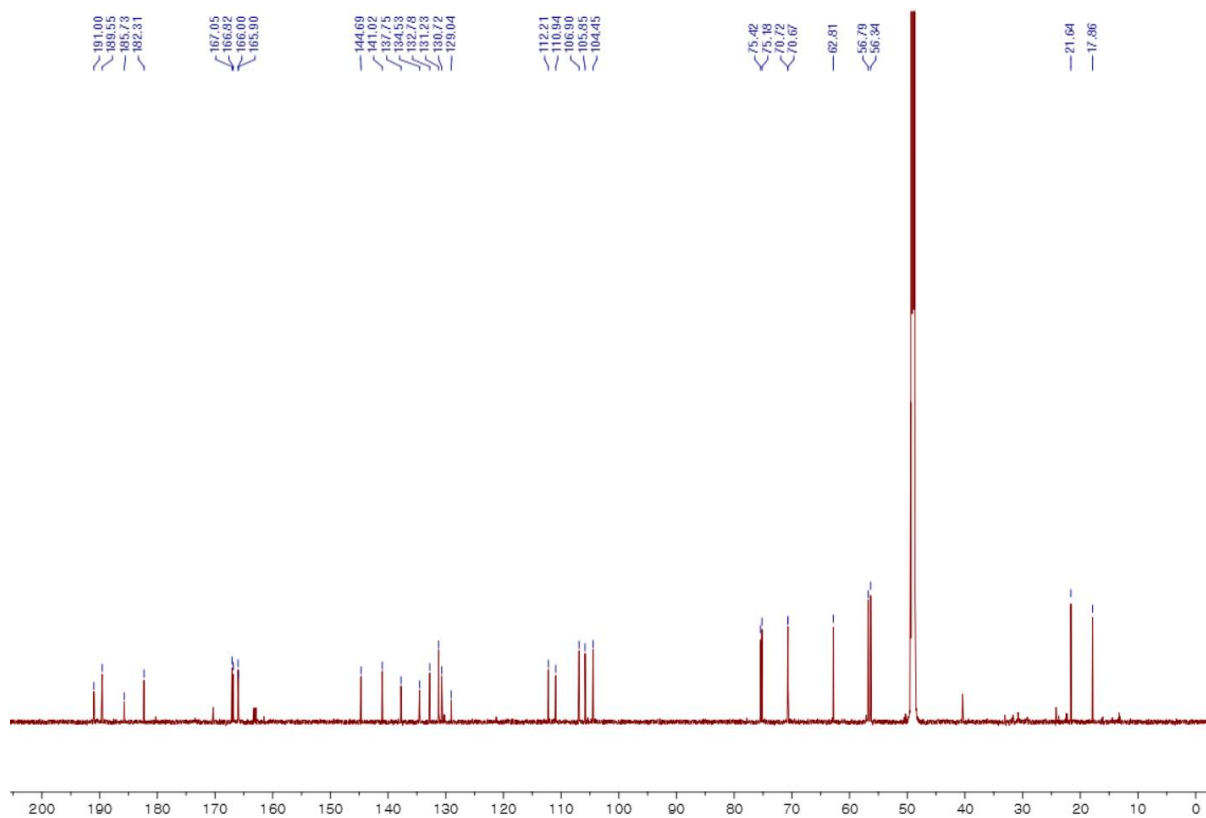

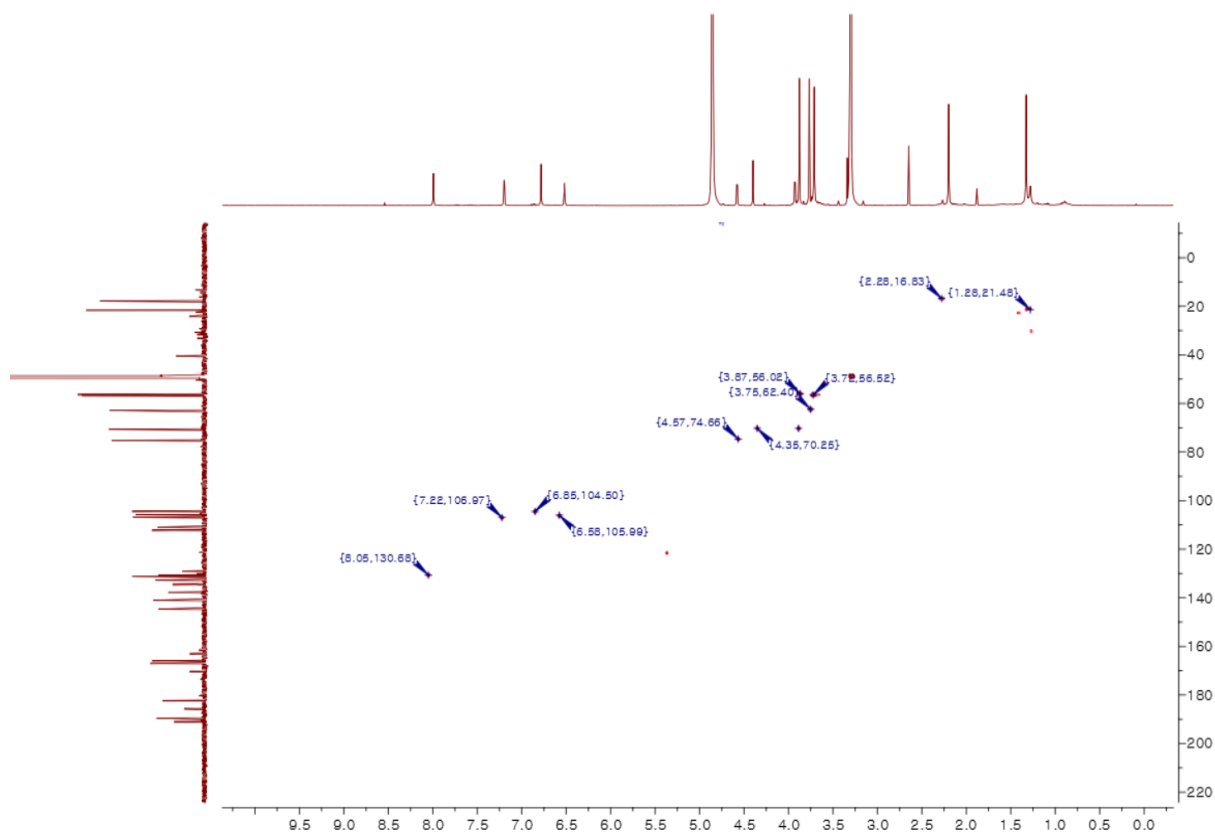

**Figure S20.** The HSQC spectrum of Alterporriol Z3 (**3**) (500MHz, CD<sub>3</sub>OD)

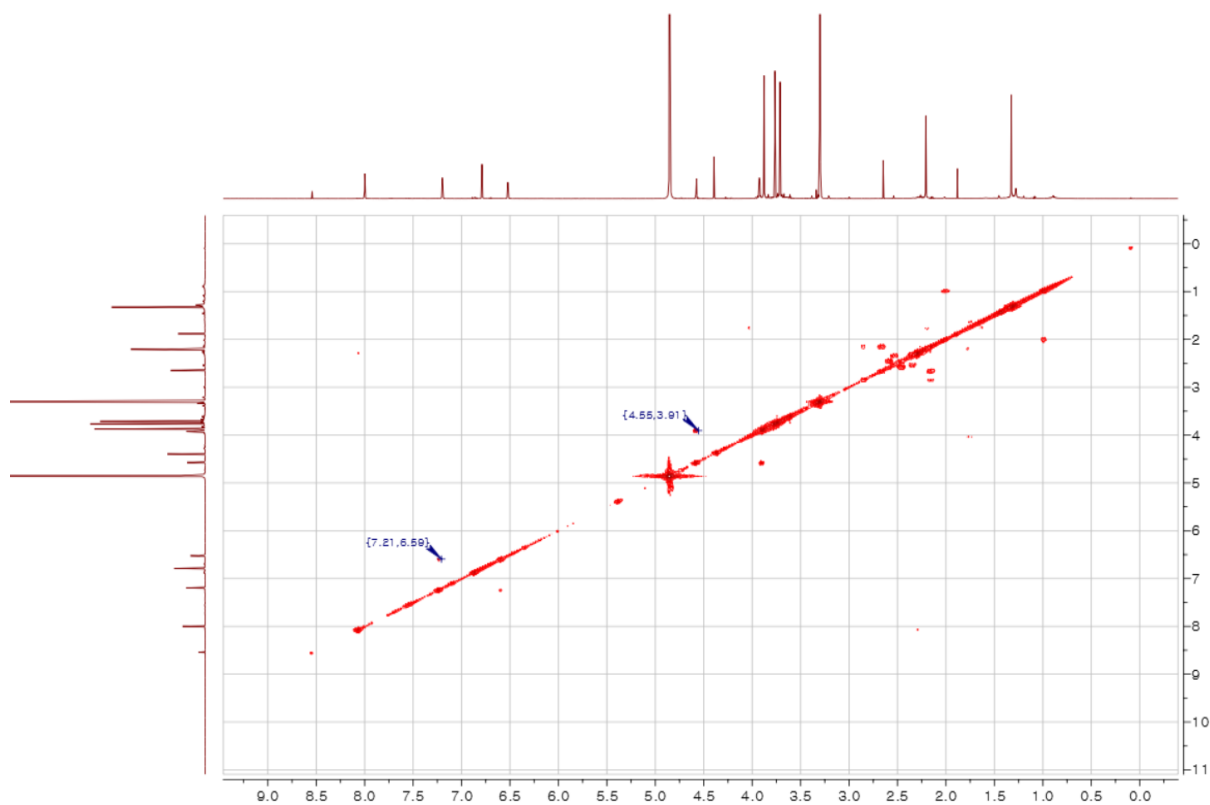

**Figure S21.** The COSY spectrum of Alterporriol Z3 (**3**) (500MHz, CD<sub>3</sub>OD)

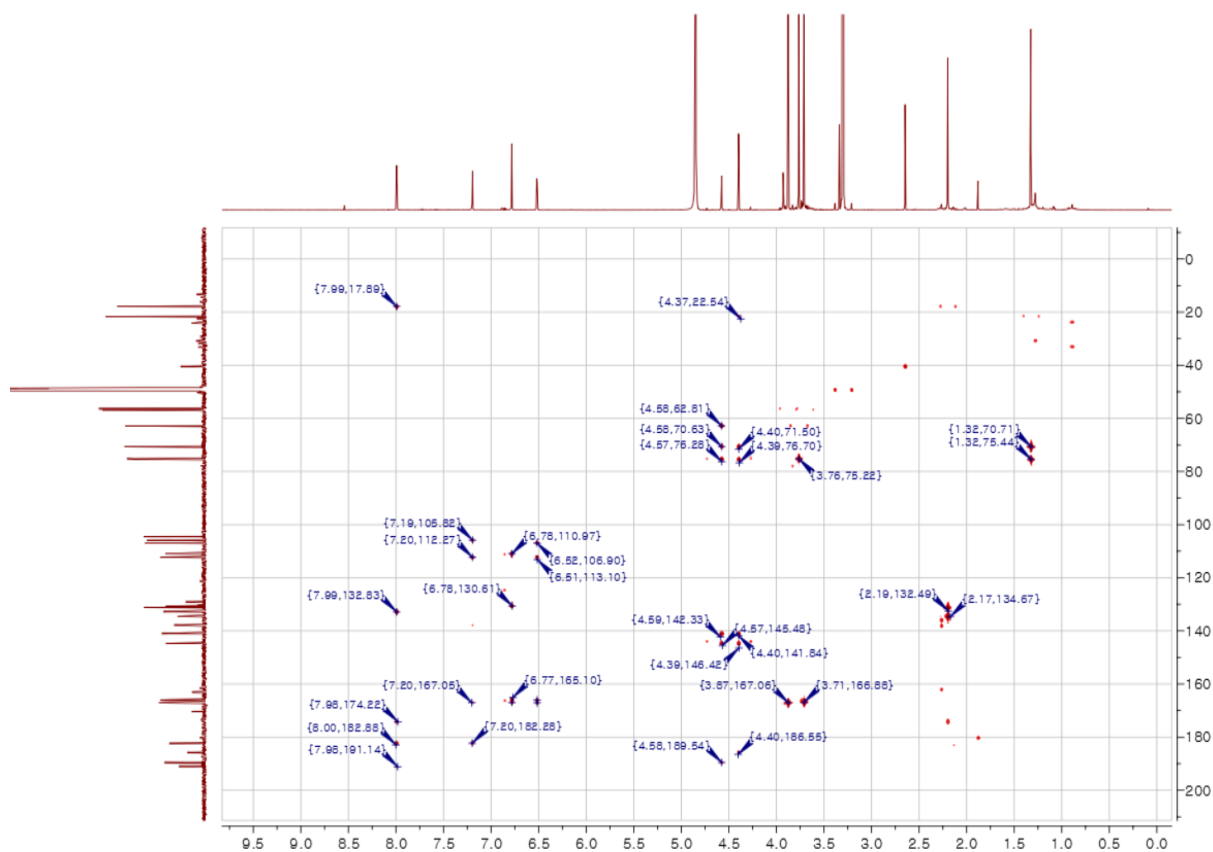

**Figure S22.** The HMBC spectrum of Alterporriol Z3 (**3**) (800MHz, CD<sub>3</sub>OD)

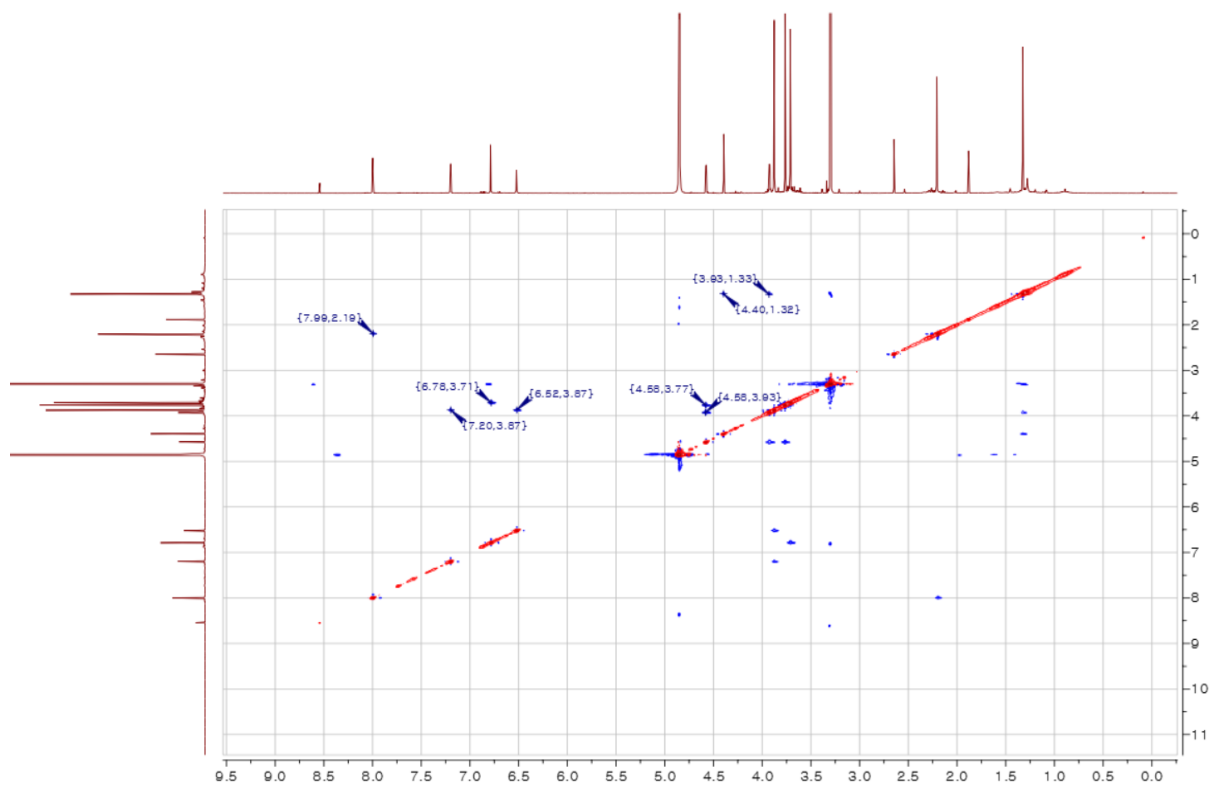

**Figure S23.** The NOESY spectrum of Alterporriol Z3 (**3**) (500MHz, CD<sub>3</sub>OD)

[ Elemental Composition ]

Data : HJH-3-C33H28O13

Date : 24-Oct-2016 14:10

Page: 1

Sample: -

Note : -

Inlet : Direct

Ion Mode : FAB+

RT : 0.68 min

Scan#: (14,15)

Elements : C 33/0, H 28/0, O 13/0, Na 1/0

Mass Tolerance : 1000ppm, 1mmu if m/z < 1, 3mmu if m/z > 3

Unsaturation (U.S.) : -0.5 - 100.0

| Observed m/z | Int%  | Err [ppm / mmu] | U.S. | Composition       |
|--------------|-------|-----------------|------|-------------------|
| 654.1349     | 29.7  | -0.1 / +0.0     | 20.0 | C 33 H 27 O 13 Na |
| 655.1430     | 100.0 | +0.4 / +0.2     | 19.5 | C 33 H 28 O 13 Na |
| 656.1479     | 46.1  |                 |      |                   |
| 657.1496     | 13.4  |                 |      |                   |
| 677.1232     | 17.0  |                 |      |                   |
| 678.1359     | 11.8  |                 |      |                   |

[ Theoretical Ion Distribution ]

Molecular Formula : C33 H28 O13 Na

(m/z 655.1428, MW 655.5673, U.S. 19.5)

Base Peak : 655.1428, Averaged MW : 655.5641(a), 655.5648(w)

Page: 1

| m/z      | INT.     |       |
|----------|----------|-------|
| 655.1428 | 100.0000 | ***** |
| 656.1461 | 37.1989  | ***** |
| 657.1488 | 9.3208   | ***** |
| 658.1515 | 1.7519   | *     |
| 659.1541 | 0.2724   |       |
| 660.1566 | 0.0363   |       |
| 661.1591 | 0.0043   |       |
| 662.1616 | 0.0005   |       |

**Figure S24.** The HRFABMS data of Alterporriol Z3 (3)



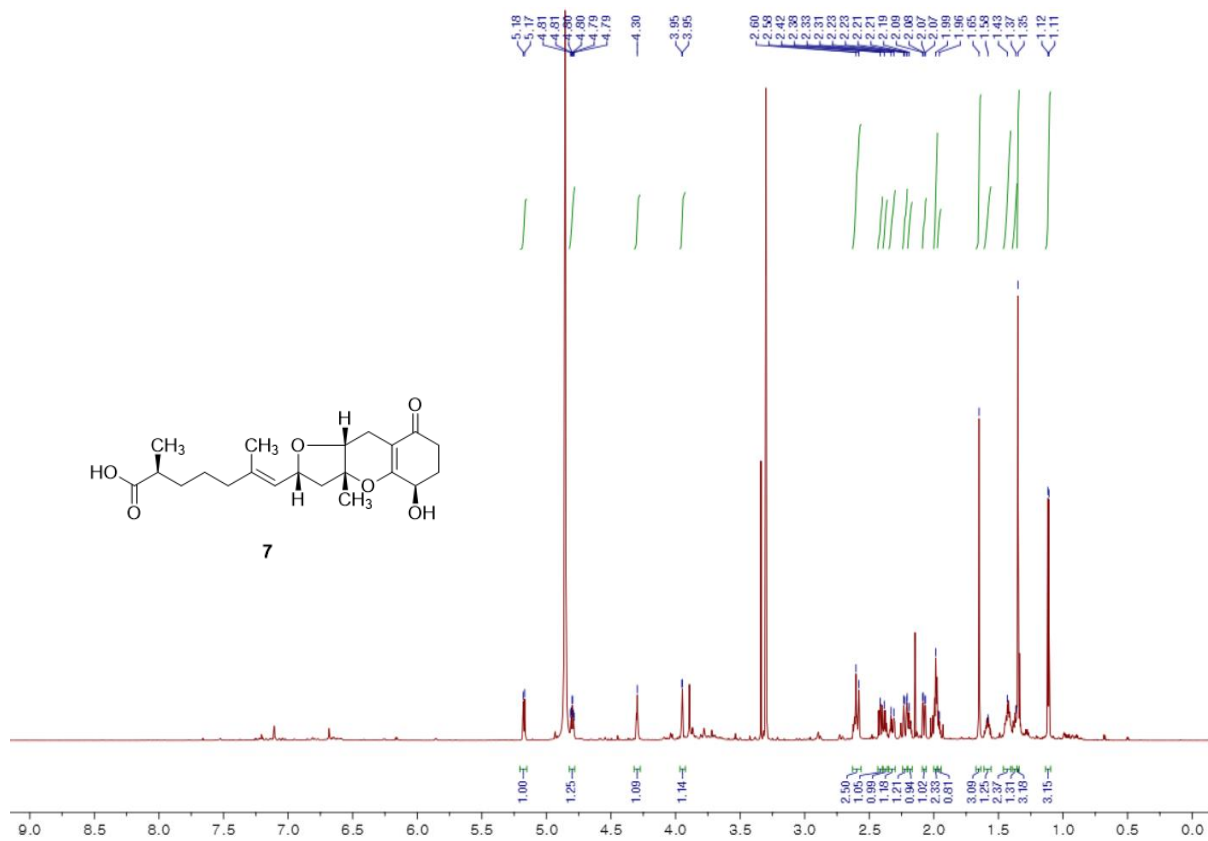

**Figure S25.** The <sup>1</sup>H NMR spectrum of Tricycloalterfurene E (7) (800MHz, CD<sub>3</sub>OD)

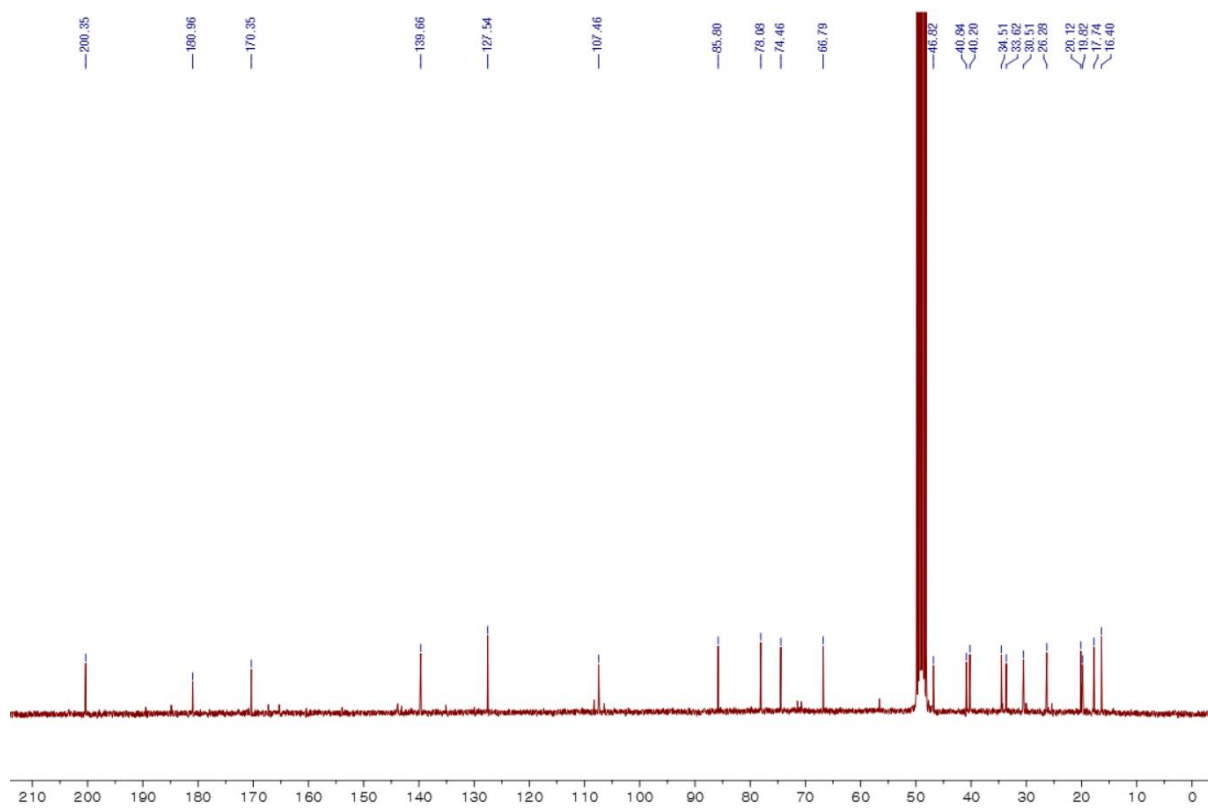

**Figure S26.** The <sup>13</sup>C NMR spectrum of Tricycloalterfurene E (7) (100MHz, CD<sub>3</sub>OD)

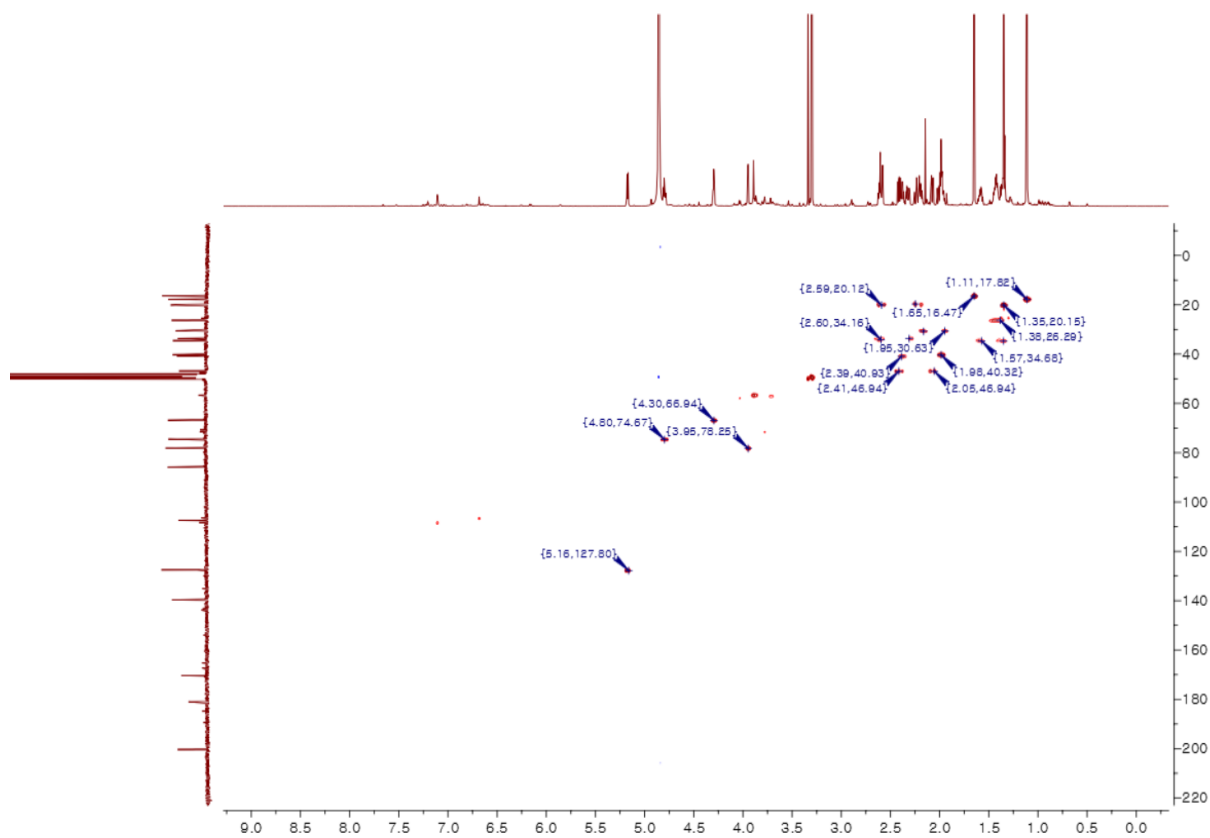

**Figure S27.** The HSQC spectrum of Tricycloalterfurene E (**7**) (400MHz, CD<sub>3</sub>OD)

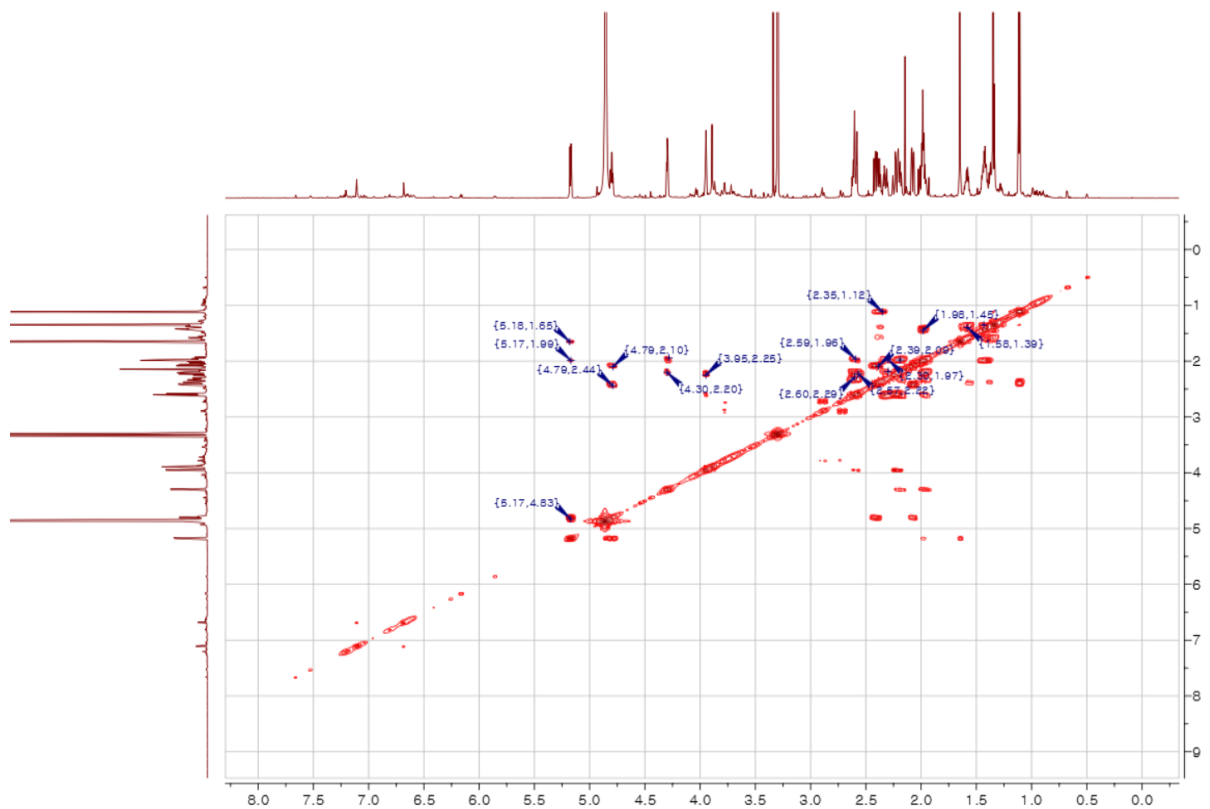

**Figure S28.** The COSY spectrum of Tricycloalterfurene E (**7**) (400MHz, CD<sub>3</sub>OD)

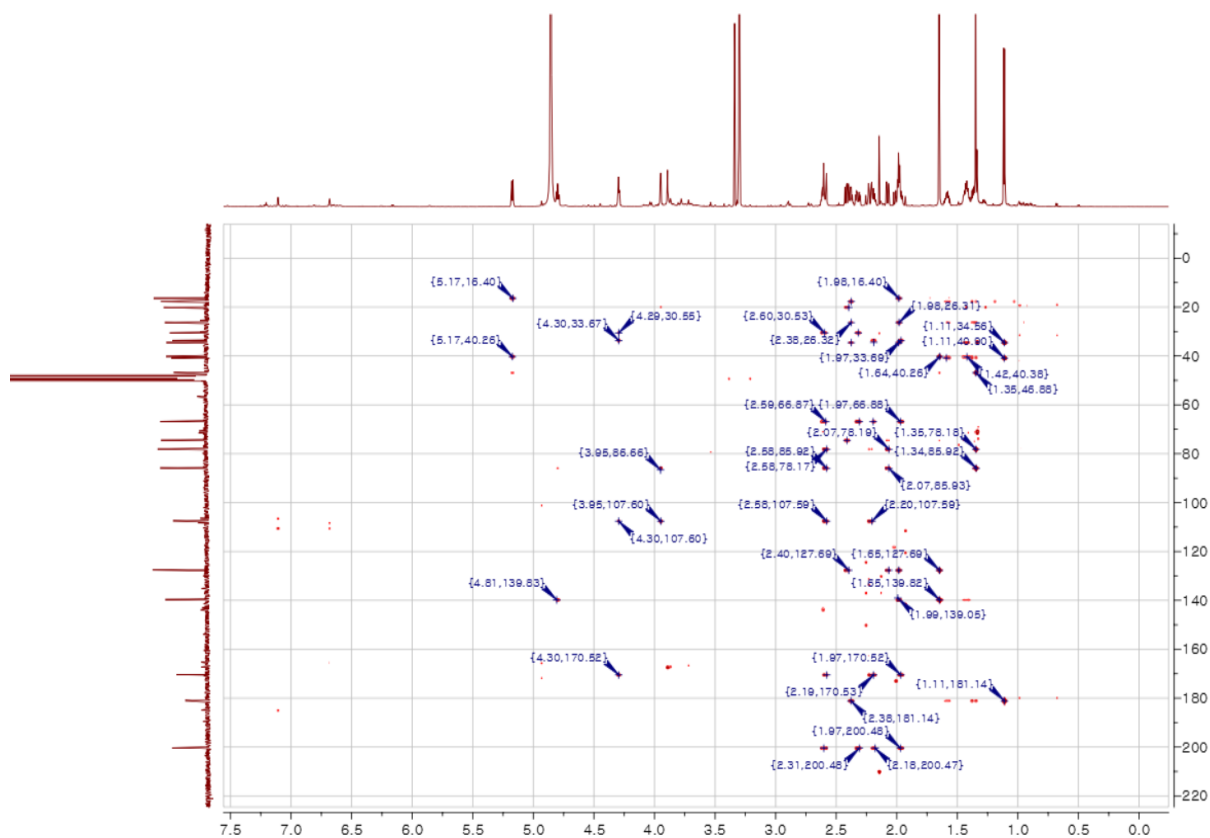

**Figure S29.** The HMBC spectrum of Tricycloalterfurene E (7) (800MHz, CD<sub>3</sub>OD)

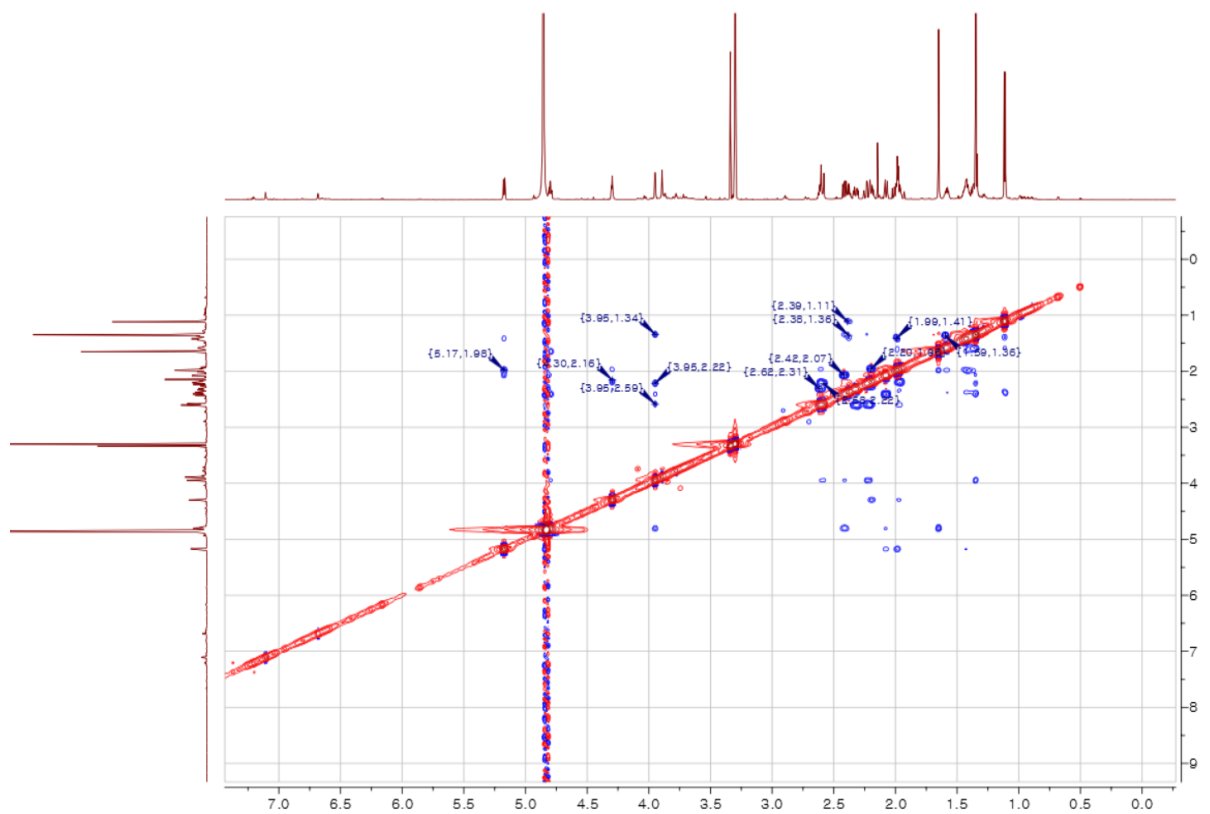

**Figure S30.** The NOESY spectrum of Tricycloalterfurene E (7) (600MHz, CD<sub>3</sub>OD)

[ Elemental Composition ] Page: 1  
 Data : HJH-4-C21H30O6 Date : 24-Oct-2016 14:17  
 Sample: -  
 Note : -  
 Inlet : Direct Ion Mode : FAB+  
 RT : 0.48 min Scan#: (10,11)  
 Elements : C 21/0, H 31/0, O 6/0  
 Mass Tolerance : 1000ppm, 1mmu if m/z < 1, 3mmu if m/z > 3  
 Unsaturation (U.S.) : -0.5 - 100.0

| Observed m/z | Int%  | Err[ppm / mmu] | U.S. | Composition   |
|--------------|-------|----------------|------|---------------|
| 378.2040     | 15.5  | -0.6 / -0.2    | 7.0  | C 21 H 30 O 6 |
| 379.2118     | 100.0 | -0.7 / -0.3    | 6.5  | C 21 H 31 O 6 |
| 380.2150     | 26.8  |                |      |               |
| 401.1942     | 20.2  |                |      |               |

[ Theoretical Ion Distribution ] Page: 1  
 Molecular Formula : C21 H31 O6  
 (m/z 379.2121, MW 379.4735, U.S. 6.5)  
 Base Peak : 379.2121, Averaged MW : 379.4702(a), 379.4709(w)

| m/z      | INT.     |       |
|----------|----------|-------|
| 379.2121 | 100.0000 | ***** |
| 380.2154 | 23.5855  | ***** |
| 381.2180 | 3.8543   | **    |
| 382.2207 | 0.4722   |       |
| 383.2232 | 0.0474   |       |
| 384.2258 | 0.0040   |       |
| 385.2283 | 0.0003   |       |

**Figure S31.** The HRFABMS data of Tricycloalterfurene E (7)

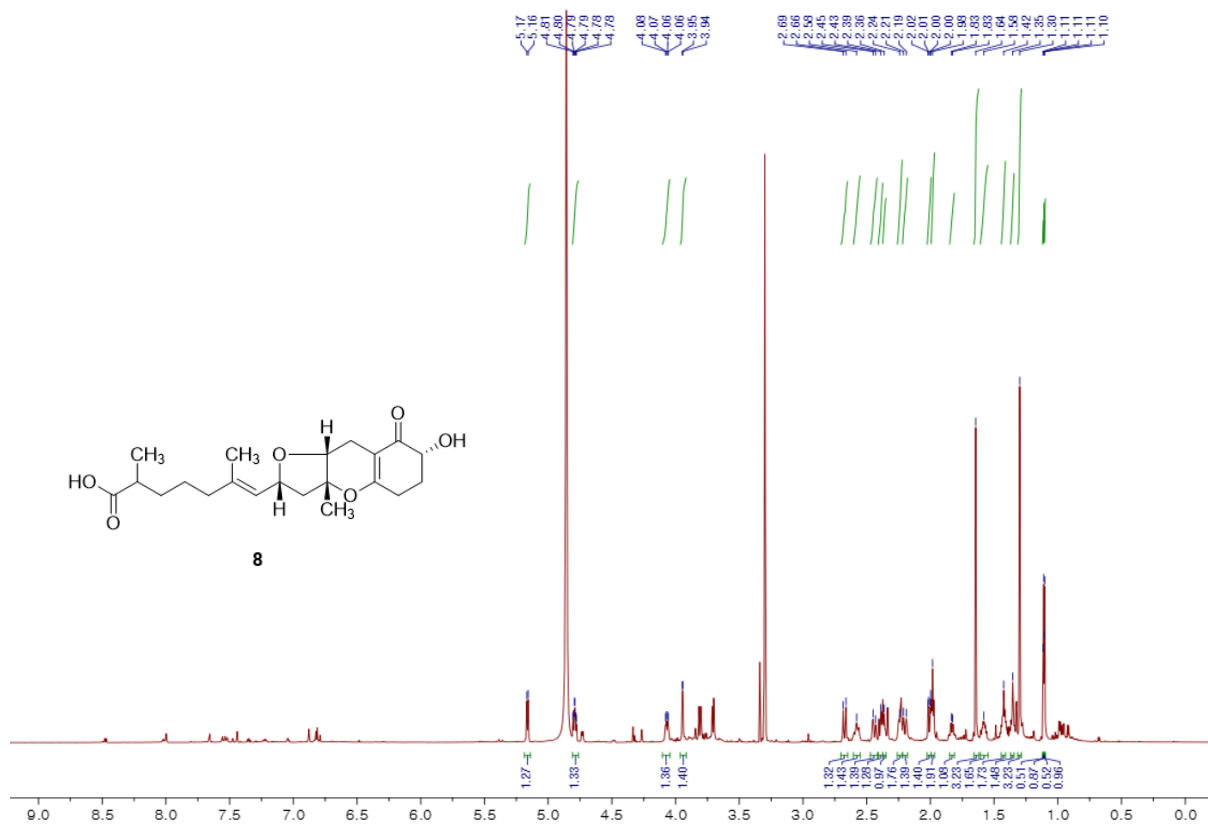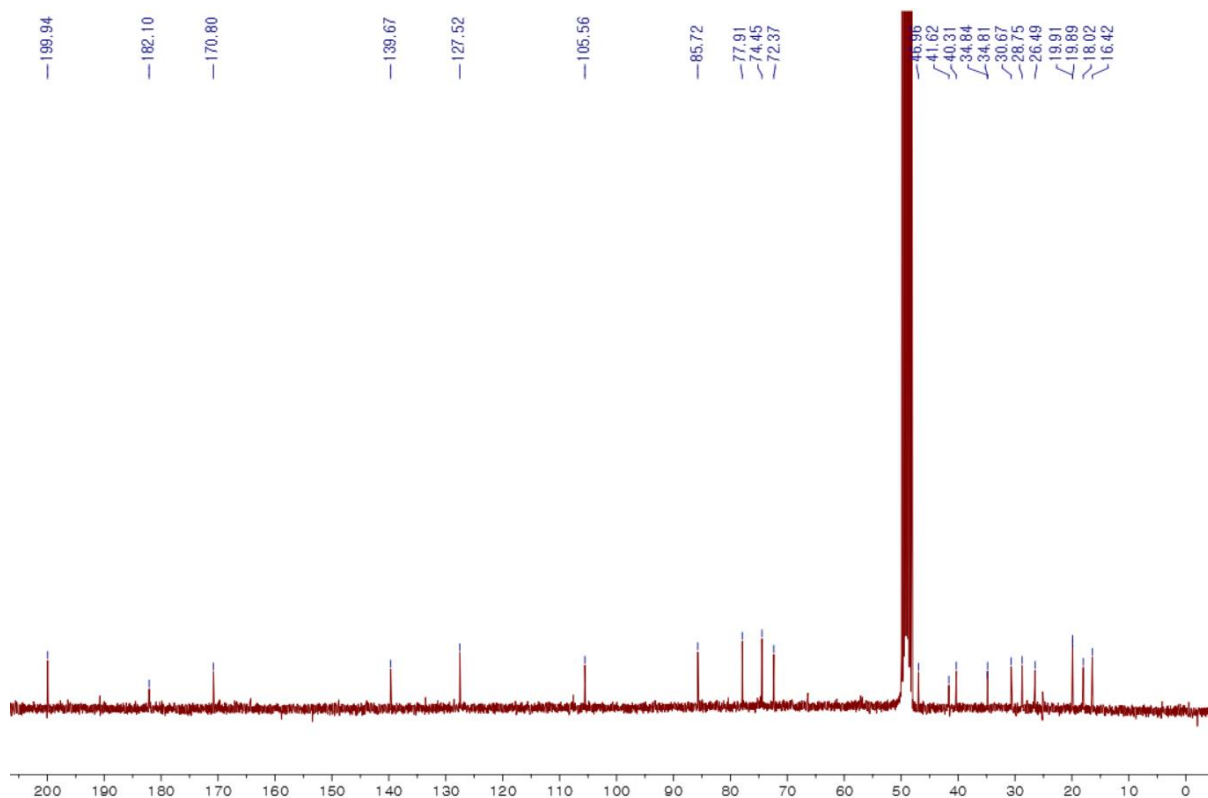

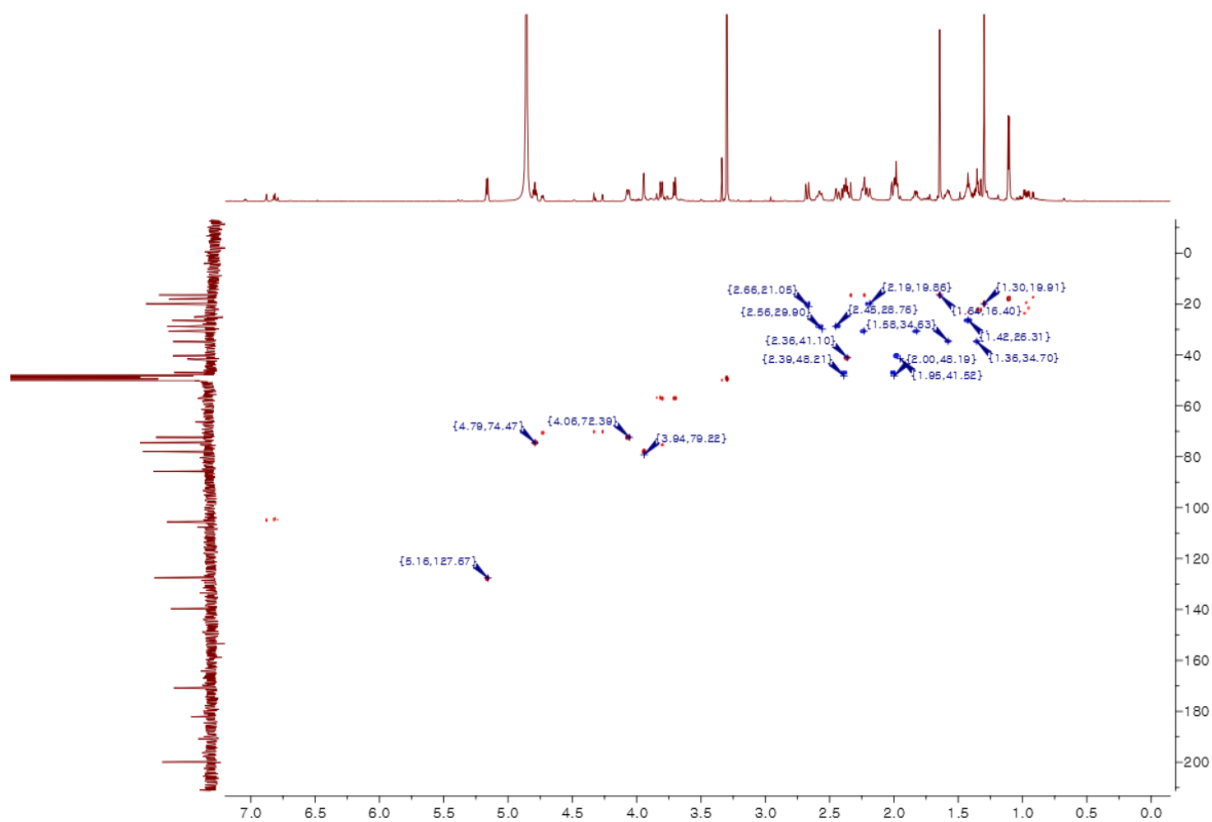

**Figure S34.** The HSQC spectrum of Tricycloalterfurene F (8) (800MHz,  $\text{CD}_3\text{OD}$ )

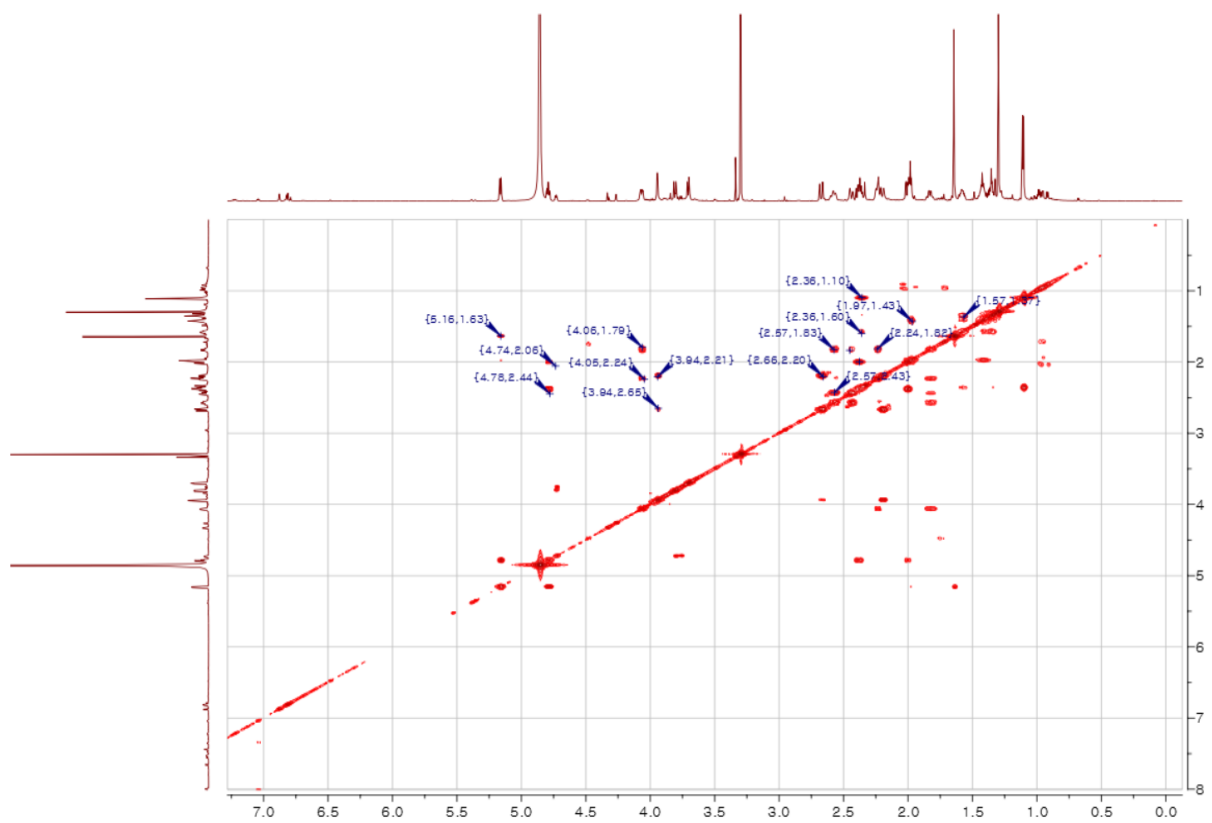

**Figure S35.** The COSY spectrum of Tricycloalterfurene F (8) (800MHz,  $\text{CD}_3\text{OD}$ )

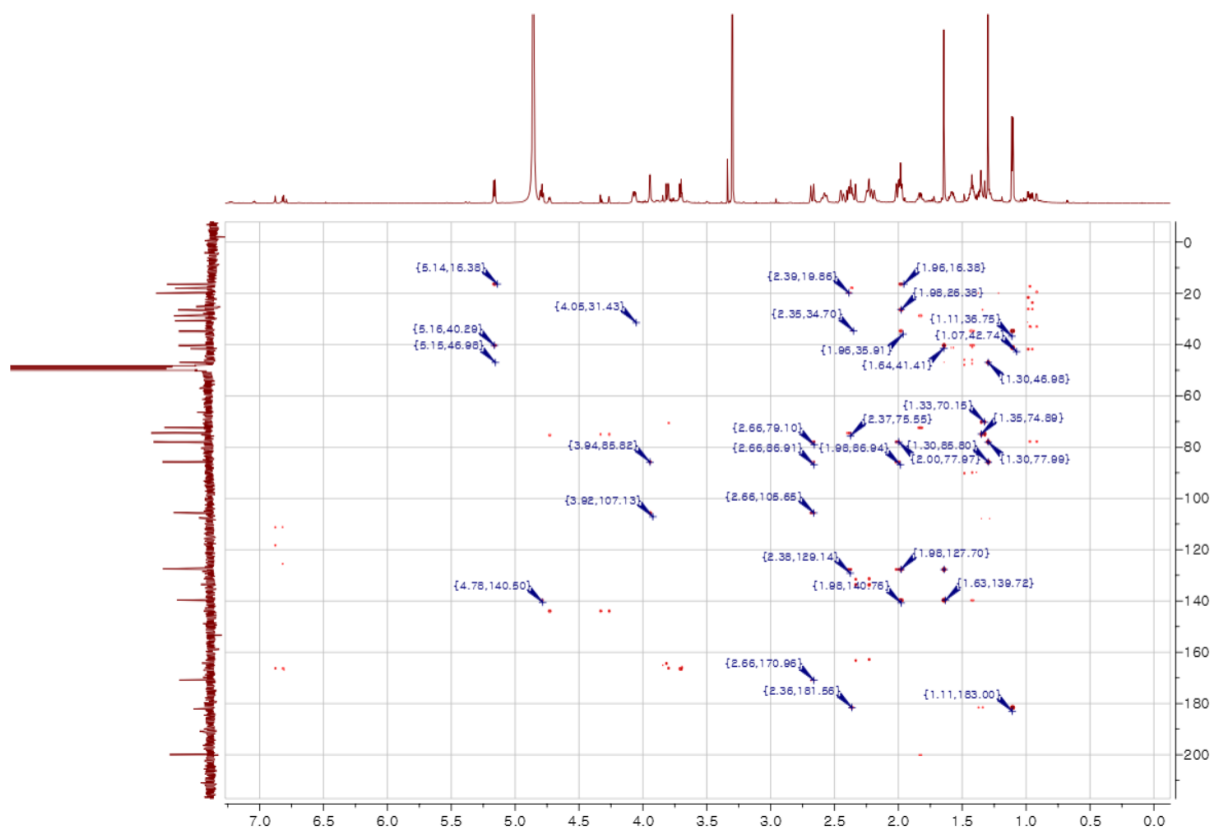

**Figure S36.** The HMBC spectrum of Tricycloalterfurene F (8) (800MHz, CD<sub>3</sub>OD)

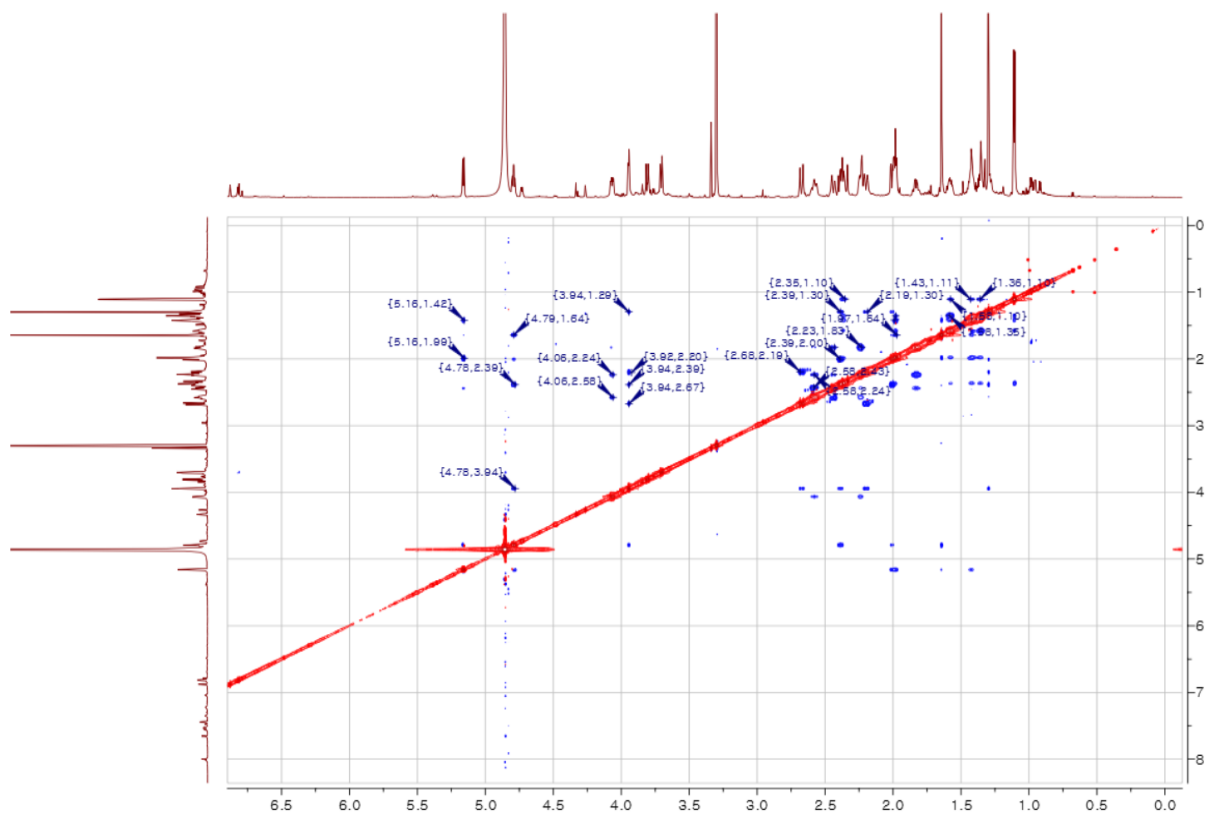

**Figure S37.** The NOESY spectrum of Tricycloalterfurene F (8) (800MHz, CD<sub>3</sub>OD)

[ Elemental Composition ]

Page: 1

Data : HJH-5-C21H30O6 Date : 24-Oct-2016 14:35  
 Sample: -  
 Note : -  
 Inlet : Direct Ion Mode : FAB+  
 RT : 0.53 min Scan#: (11,12)  
 Elements : C 21/0, H 31/0, O 6/0, Na 1/0  
 Mass Tolerance : 1000ppm, 1mmu if m/z < 1, 3mmu if m/z > 3  
 Unsaturation (U.S.) : -0.5 - 100.0

| Observed m/z | Int%  | Err[ppm / mmu] | U.S. | Composition      |
|--------------|-------|----------------|------|------------------|
| 373.1743     | 17.6  |                |      |                  |
| 379.2120     | 100.0 | -0.1 / +0.0    | 6.5  | C 21 H 31 O 6    |
| 380.2148     | 24.1  |                |      |                  |
| 401.1942     | 91.9  | +0.4 / +0.2    | 6.5  | C 21 H 30 O 6 Na |
| 402.1957     | 22.1  |                |      |                  |

[ Theoretical Ion Distribution ]

Page: 1

Molecular Formula : C21 H31 O6  
 (m/z 379.2121, MW 379.4735, U.S. 6.5)  
 Base Peak : 379.2121, Averaged MW : 379.4702(a), 379.4709(w)

| m/z      | INT.     |       |
|----------|----------|-------|
| 379.2121 | 100.0000 | ***** |
| 380.2154 | 23.5855  | ***** |
| 381.2180 | 3.8543   | **    |
| 382.2207 | 0.4722   |       |
| 383.2232 | 0.0474   |       |
| 384.2258 | 0.0040   |       |
| 385.2283 | 0.0003   |       |

**Figure S38.** The HRFABMS data of Tricycloalterfurene F (8)



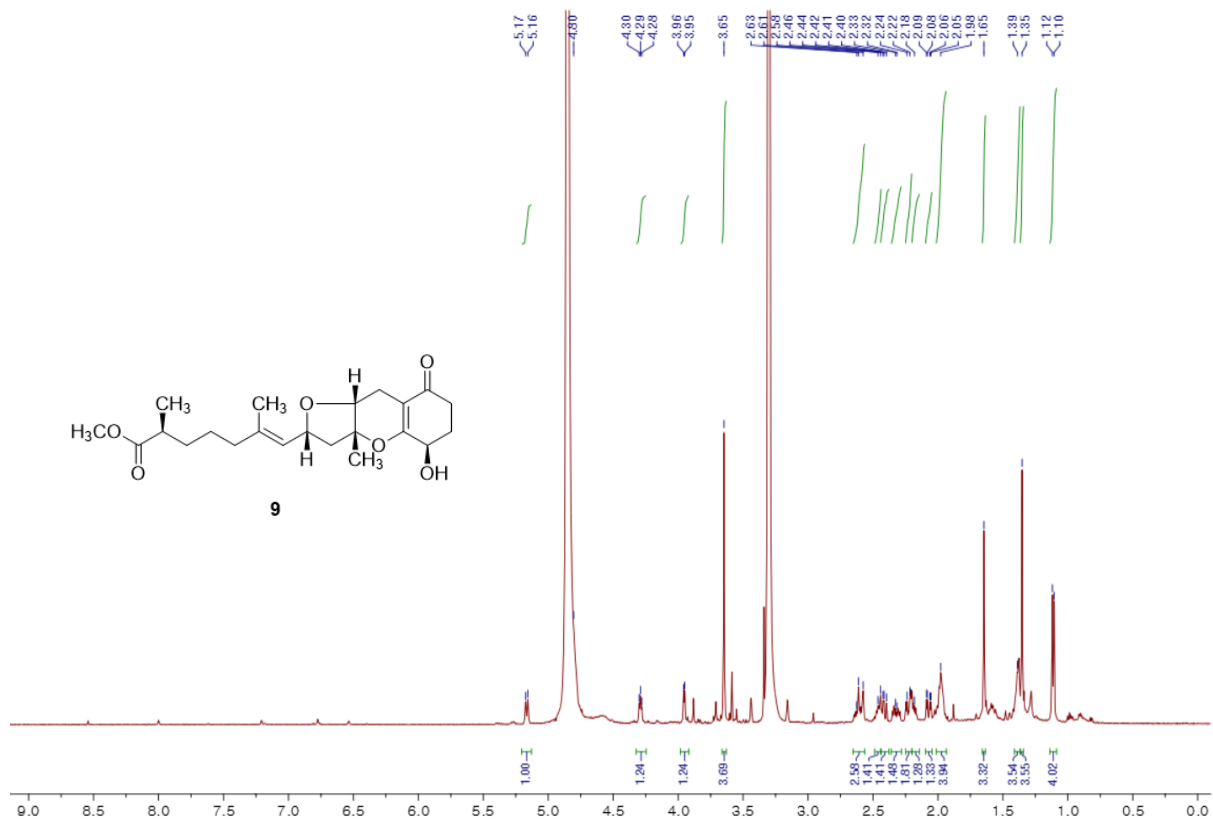

**Figure S39.** The <sup>1</sup>H NMR spectrum of Tricycloalterfurene G (**9**) (500MHz, CD<sub>3</sub>OD)

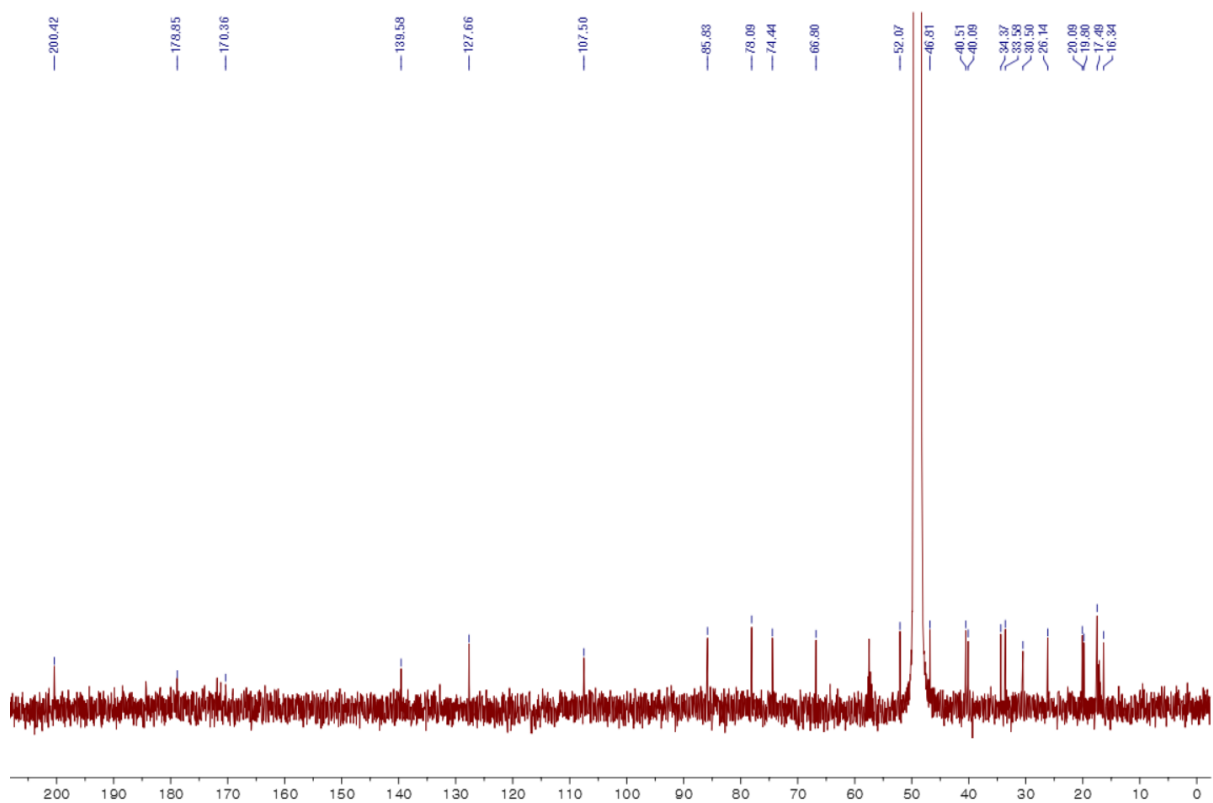

**Figure S40.** The <sup>13</sup>C NMR spectrum of Tricycloalterfurene G (**9**) (100MHz, CD<sub>3</sub>OD)

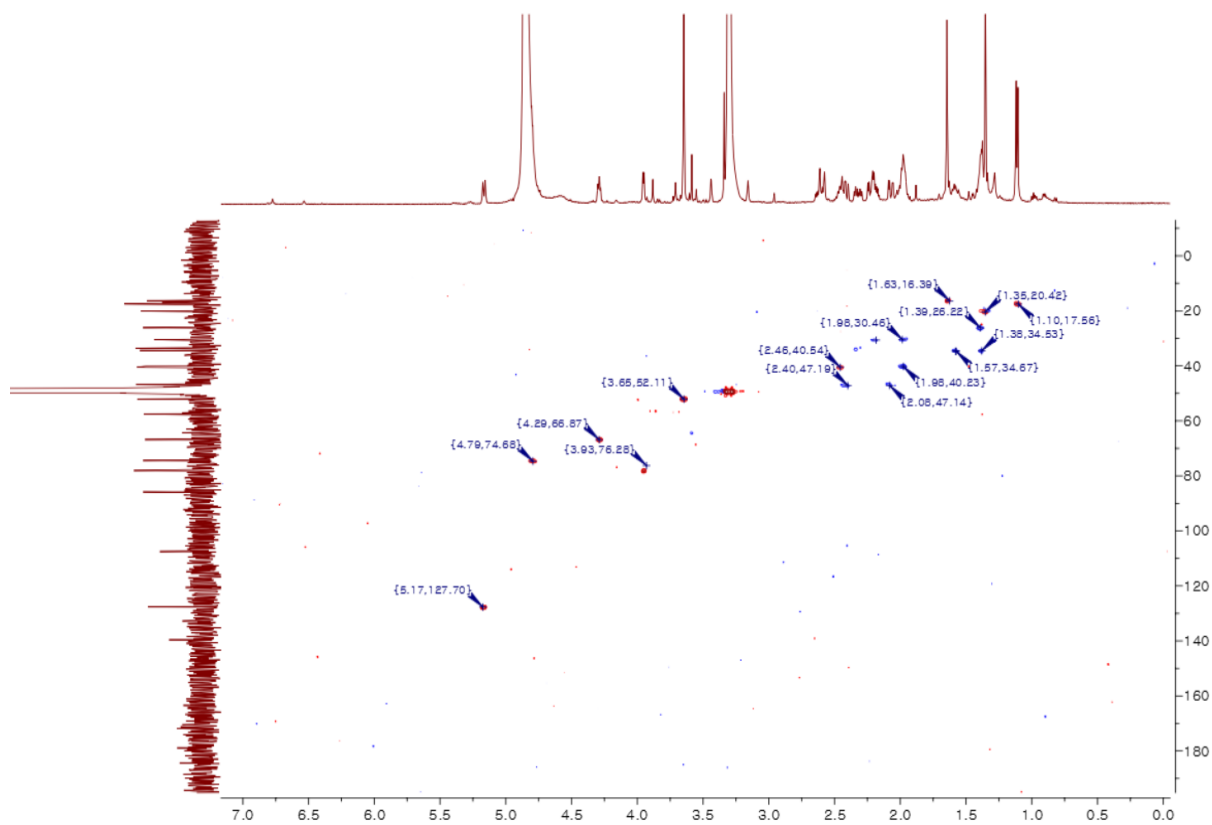

**Figure S41.** The HSQC spectrum of Tricycloalterfurene G (**9**) (500MHz, CD<sub>3</sub>OD)

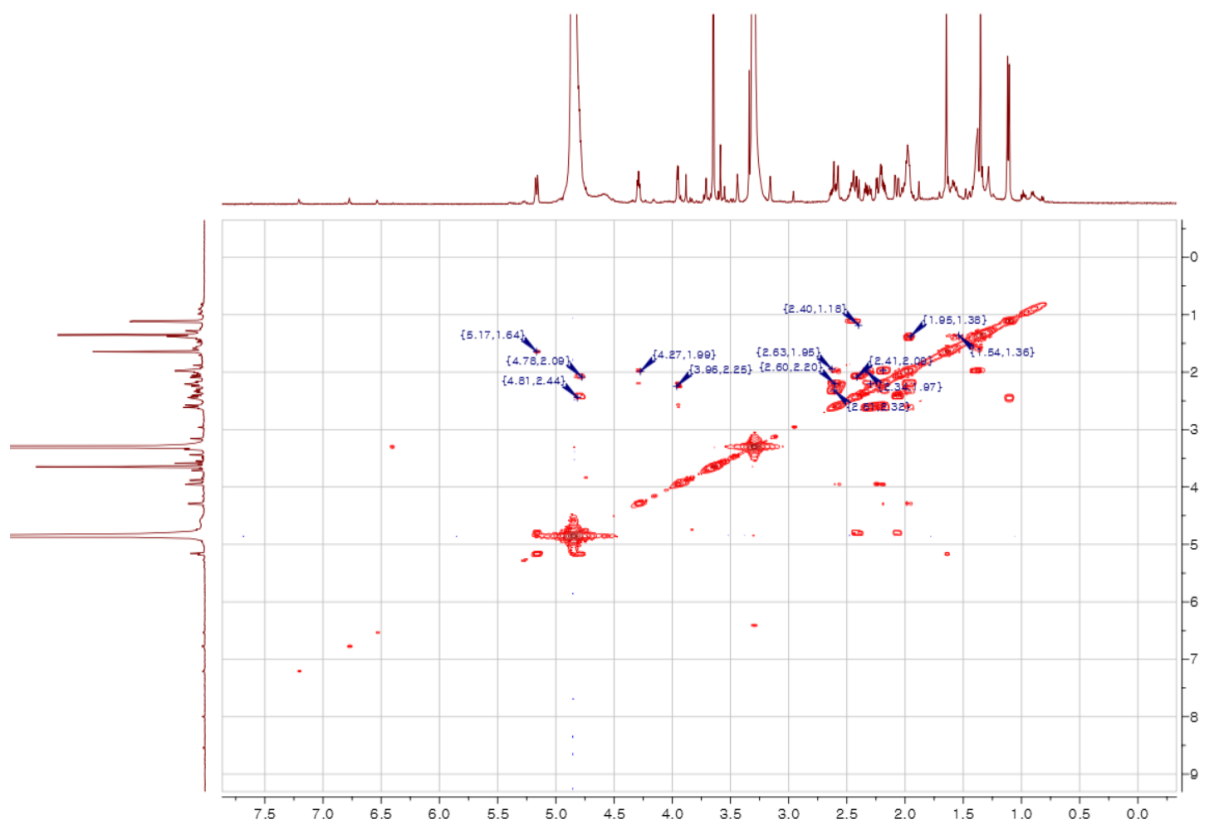

**Figure S42.** The COSY spectrum of Tricycloalterfurene G (**9**) (400MHz, CD<sub>3</sub>OD)

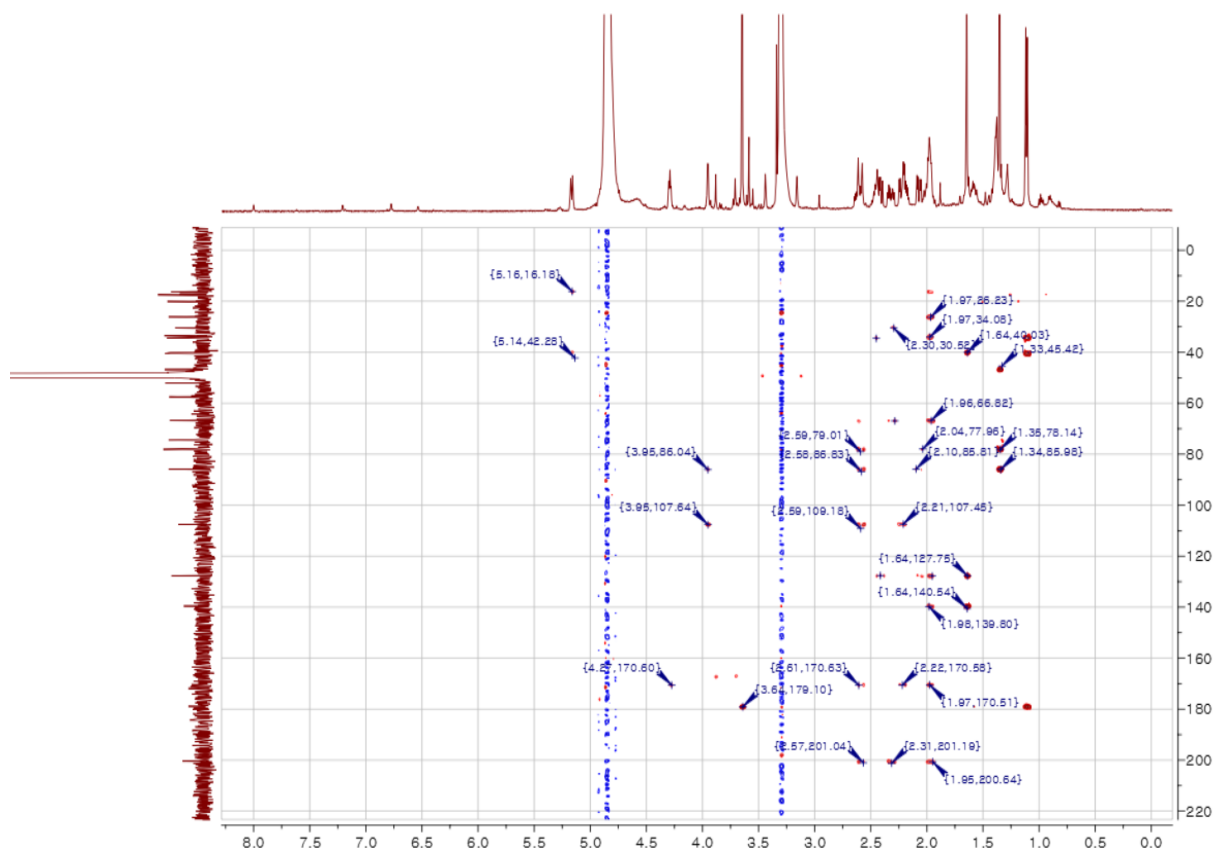

**Figure S43.** The HMBC spectrum of Tricycloalterfurene G (9) (400MHz, CD<sub>3</sub>OD)

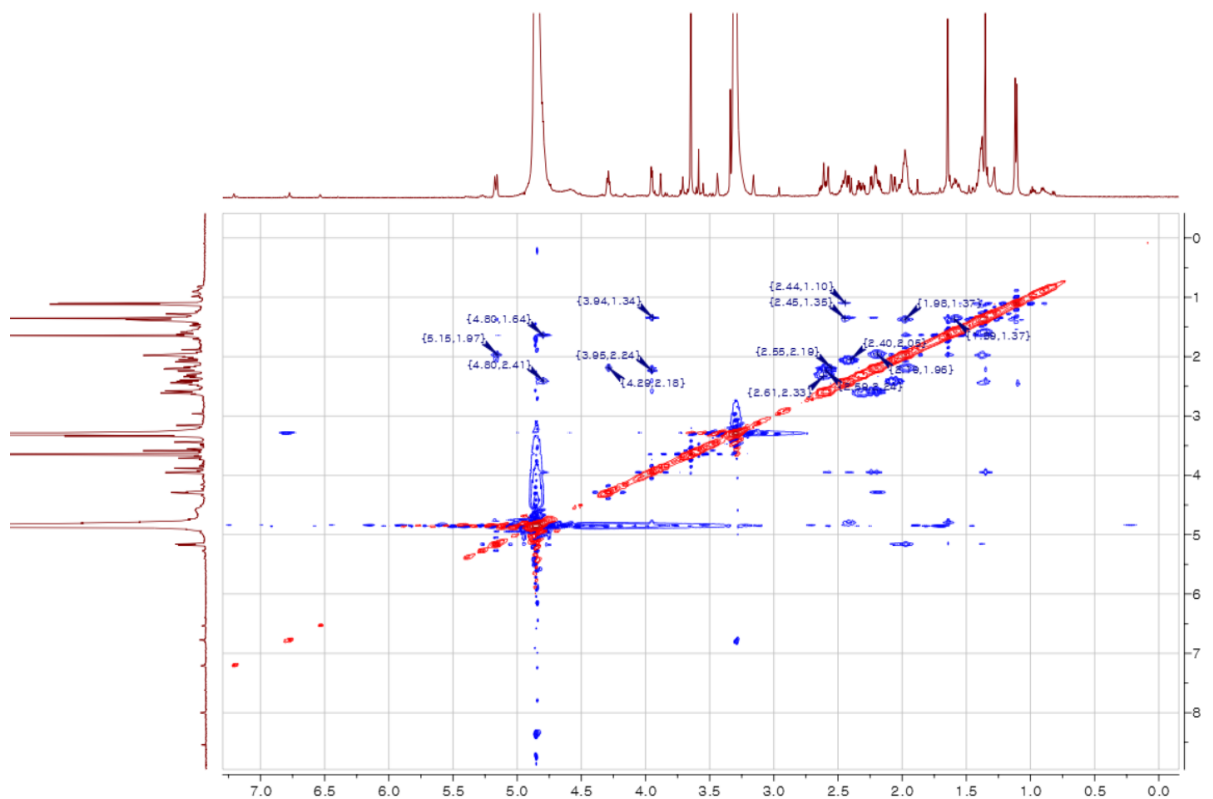

**Figure S44.** The NOESY spectrum of Tricycloalterfurene G (9) (400MHz, CD<sub>3</sub>OD)

[ Elemental Composition ]

Page: 1

Data : FAB-S652 Date : 07-Jun-2019 14:21  
 Sample: 3[006(4)-RF3RP21]  
 Note : m-NBA  
 Inlet : Direct Ion Mode : FAB+  
 RT : 4.03 min Scan#: (160,164)  
 Elements : C 100/0, H 100/0, O 10/0, Na 1/0  
 Mass Tolerance : 20ppm, 5mmu if m/z < 250, 10mmu if m/z > 500  
 Unsaturation (U.S.) : -0.5 - 50.0

| Observed m/z | Int%  | Err [ppm / mmu] | U.S. | Composition      |
|--------------|-------|-----------------|------|------------------|
| 415.2104     | 100.0 | +10.1 / +4.2    | 18.5 | C 31 H 27 O      |
|              |       | -4.0 / -1.7     | 9.5  | C 24 H 31 O 6    |
|              |       | +15.9 / +6.6    | 15.5 | C 29 H 28 O Na   |
|              |       | +1.8 / +0.7     | 6.5  | C 22 H 32 O 6 Na |

[ Theoretical Ion Distribution ]

Page: 1

Molecular Formula : C22 H32 O6 Na  
 (m/z 415.2097, MW 415.4822, U.S. 6.5)  
 Base Peak : 415.2097, Averaged MW : 415.4788(a), 415.4795(w)

| m/z      | INT.     |       |
|----------|----------|-------|
| 415.2097 | 100.0000 | ***** |
| 416.2130 | 24.6977  | ***** |
| 417.2157 | 4.1166   | **    |
| 418.2183 | 0.5151   |       |
| 419.2209 | 0.0526   |       |
| 420.2234 | 0.0046   |       |
| 421.2260 | 0.0003   |       |

**Figure S45.** The HRFABMS data of Tricycloalterfurene G (9)

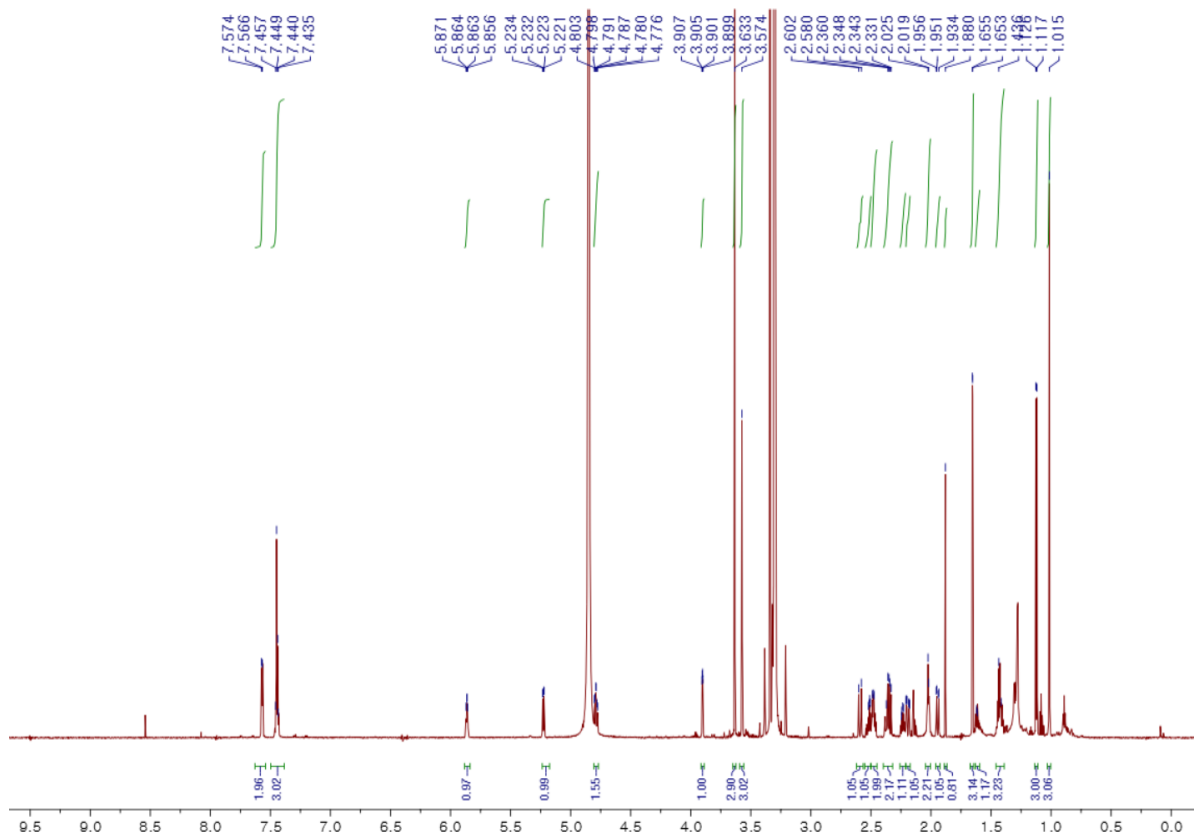

Figure S46. The  $^1\text{H}$  NMR spectrum of (*S*)-MTPA Ester of **7** (800MHz,  $\text{CD}_3\text{OD}$ )

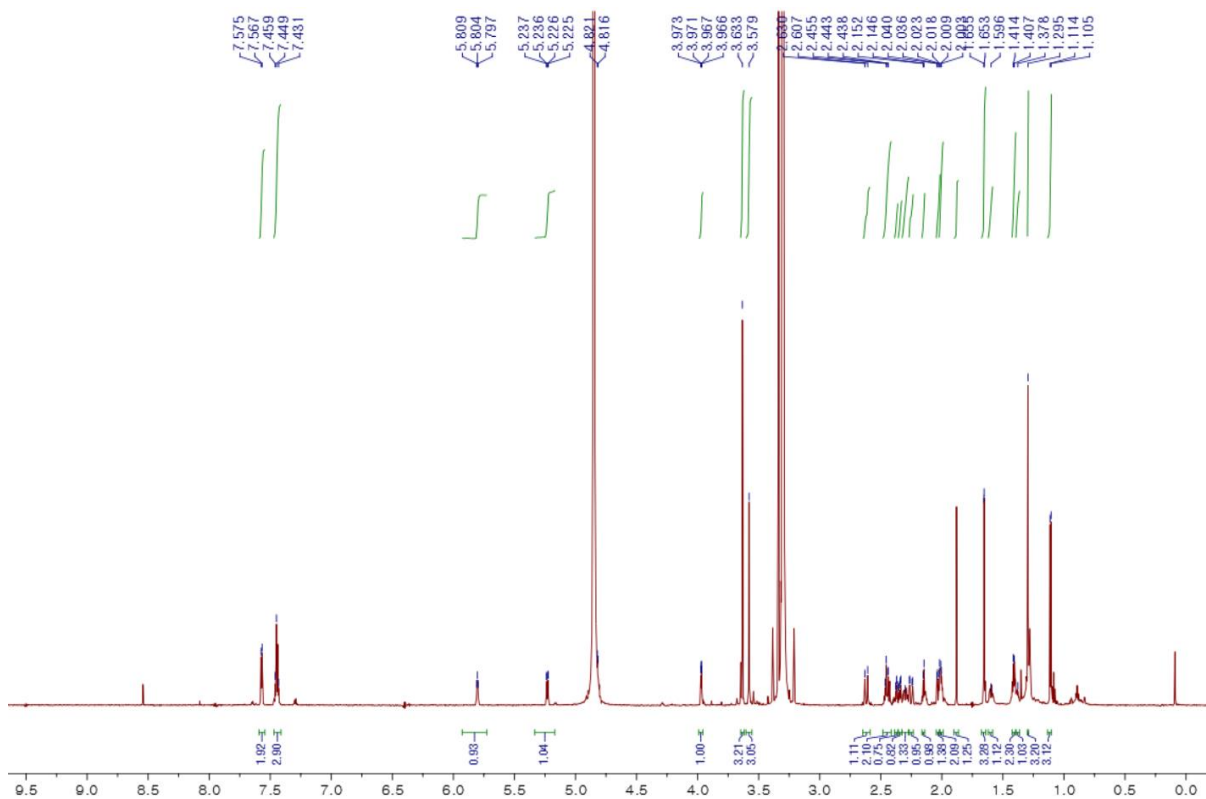

Figure S47. The  $^1\text{H}$  NMR spectrum of (*R*)-MTPA Ester of **7** (800MHz,  $\text{CD}_3\text{OD}$ )

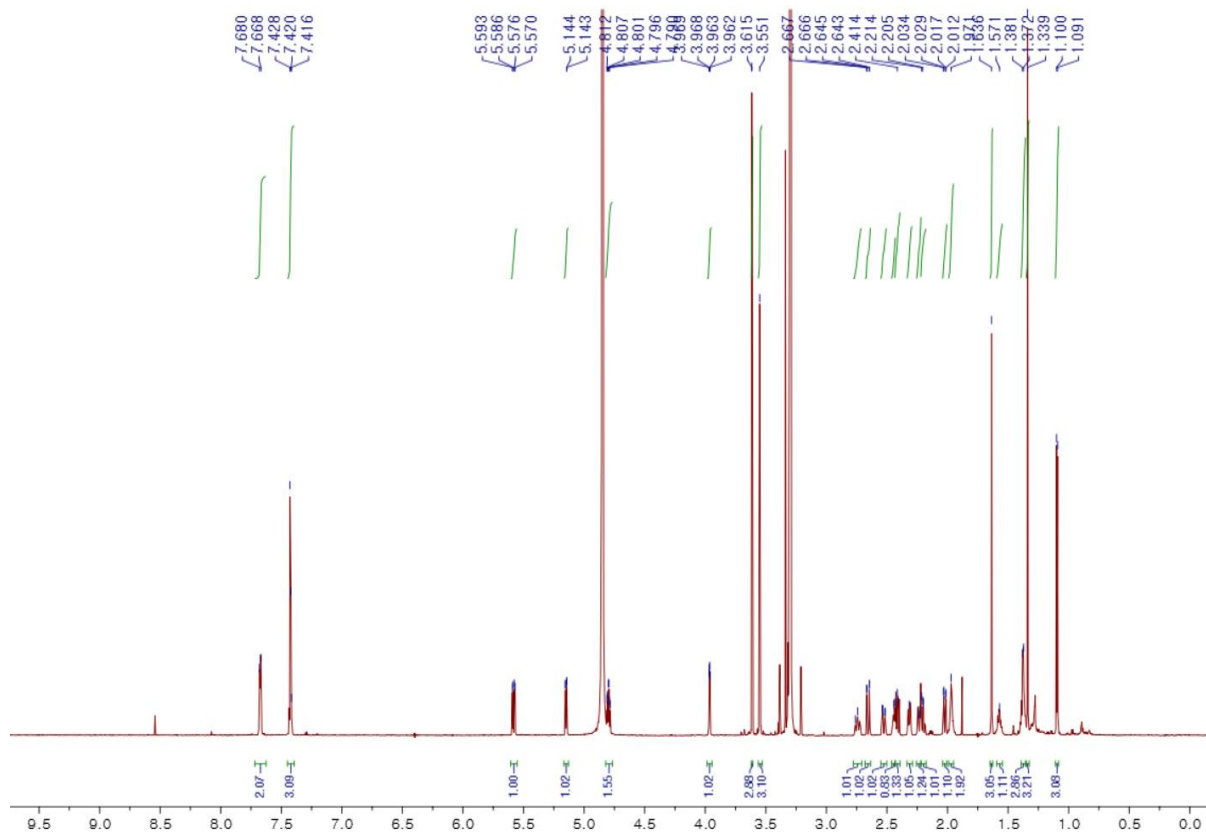

**Figure S48.** The  $^1\text{H}$  NMR spectrum of (*S*)-MTPA Ester of **8** (800MHz,  $\text{CD}_3\text{OD}$ )

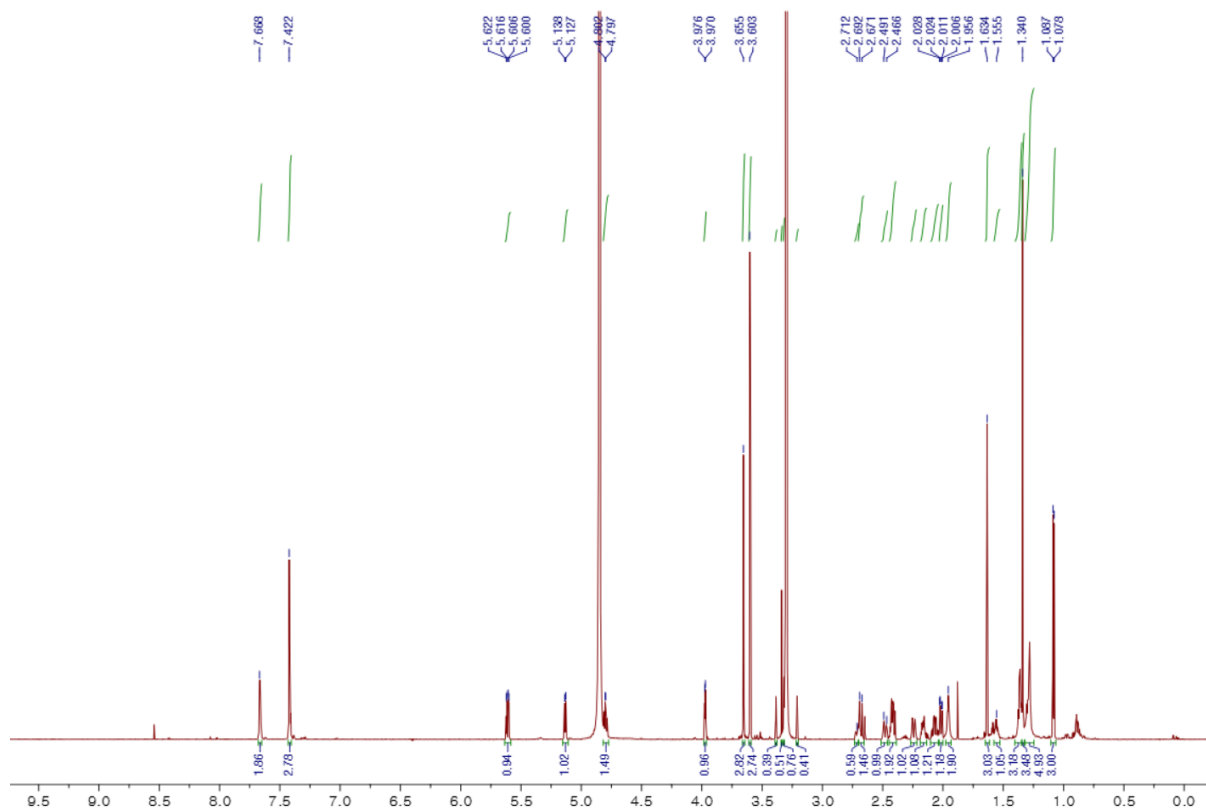

**Figure S49.** The  $^1\text{H}$  NMR spectrum of (*R*)-MTPA Ester of **8** (800MHz,  $\text{CD}_3\text{OD}$ )

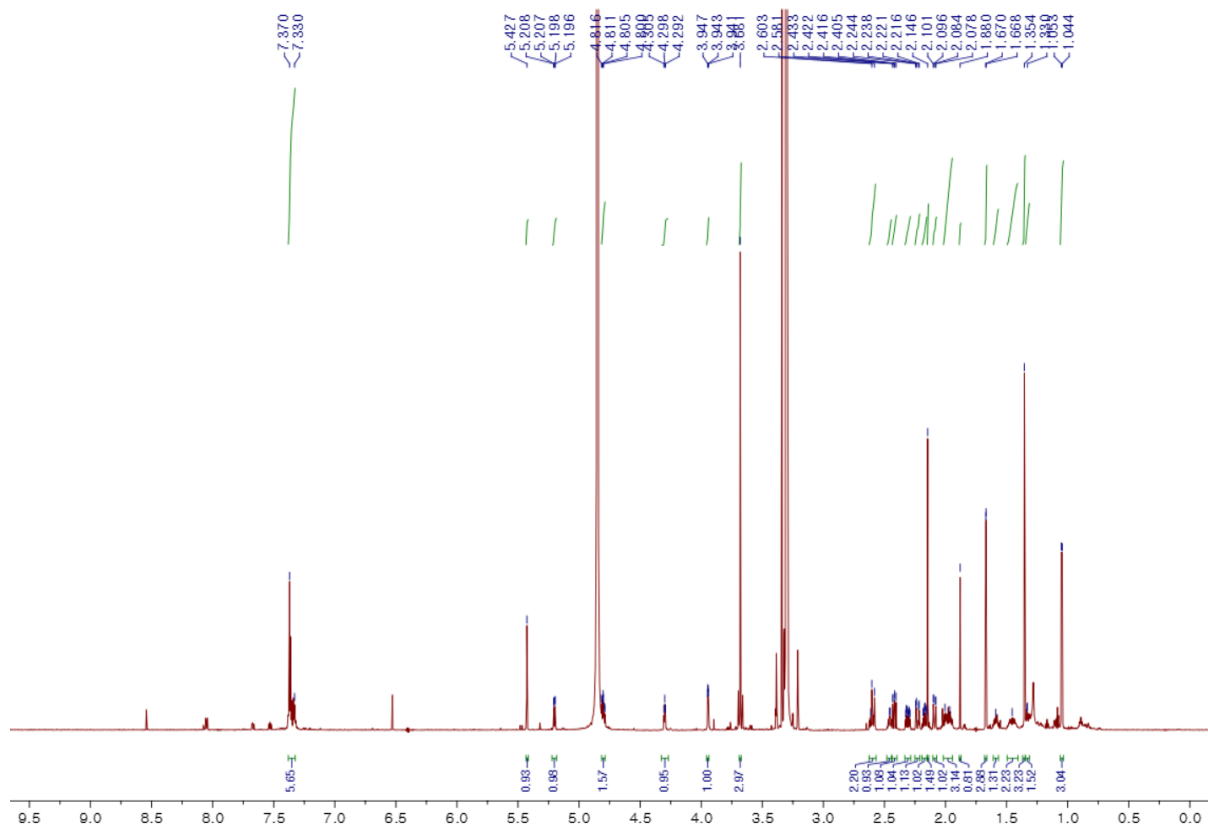

**Figure S50.** The  $^1\text{H}$  NMR spectrum of (*S*)-PGME Amide of **7** (800MHz,  $\text{CD}_3\text{OD}$ )

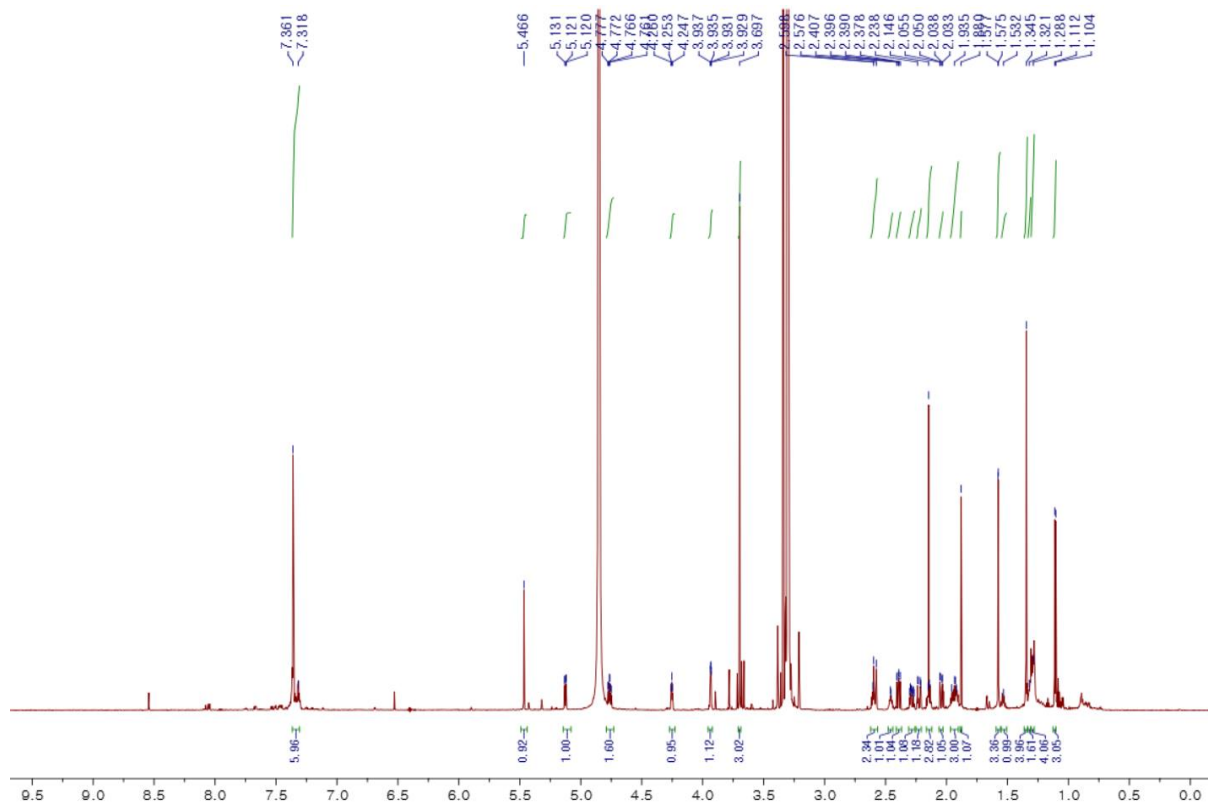

**Figure S51.** The  $^1\text{H}$  NMR spectrum of (*R*)-PGME Amide of **7** (800MHz,  $\text{CD}_3\text{OD}$ )

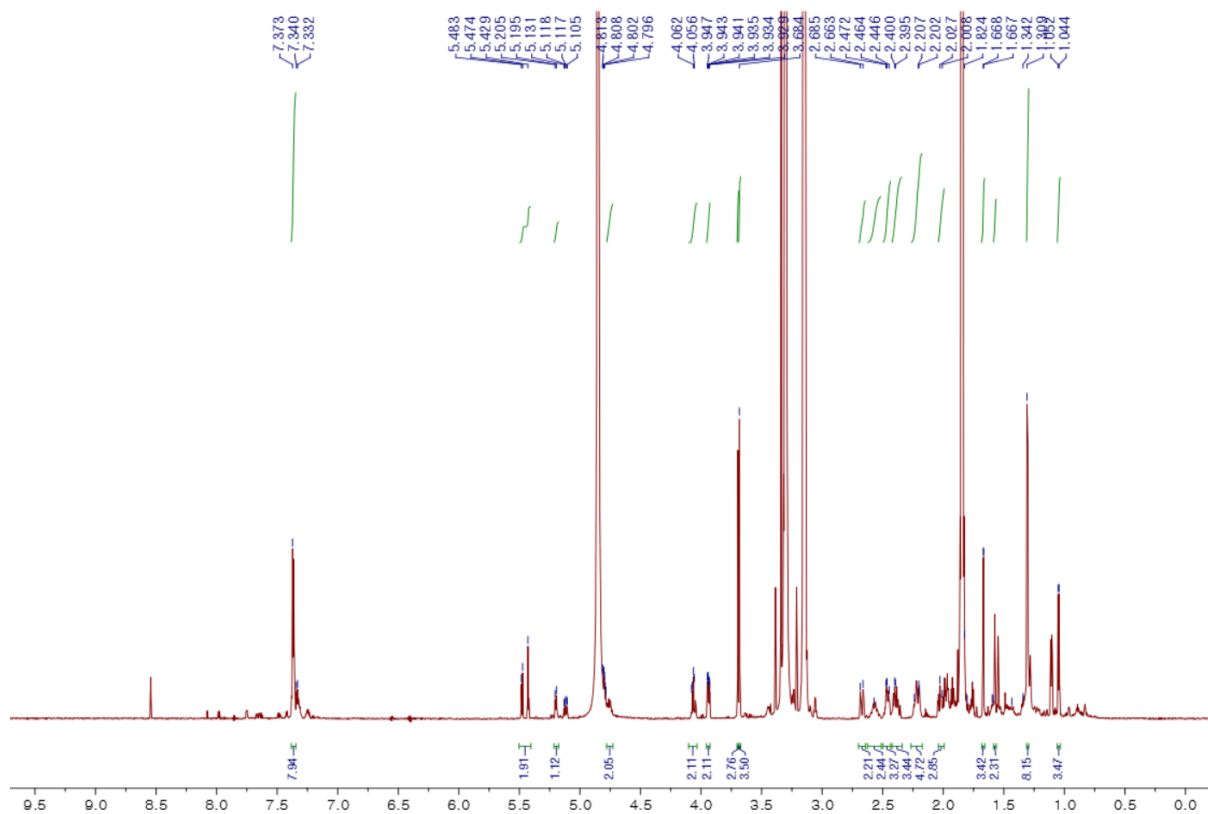

**Figure S52.** The  $^1\text{H}$  NMR spectrum of (*S*)-PGME Amide of **8** (800MHz,  $\text{CD}_3\text{OD}$ )

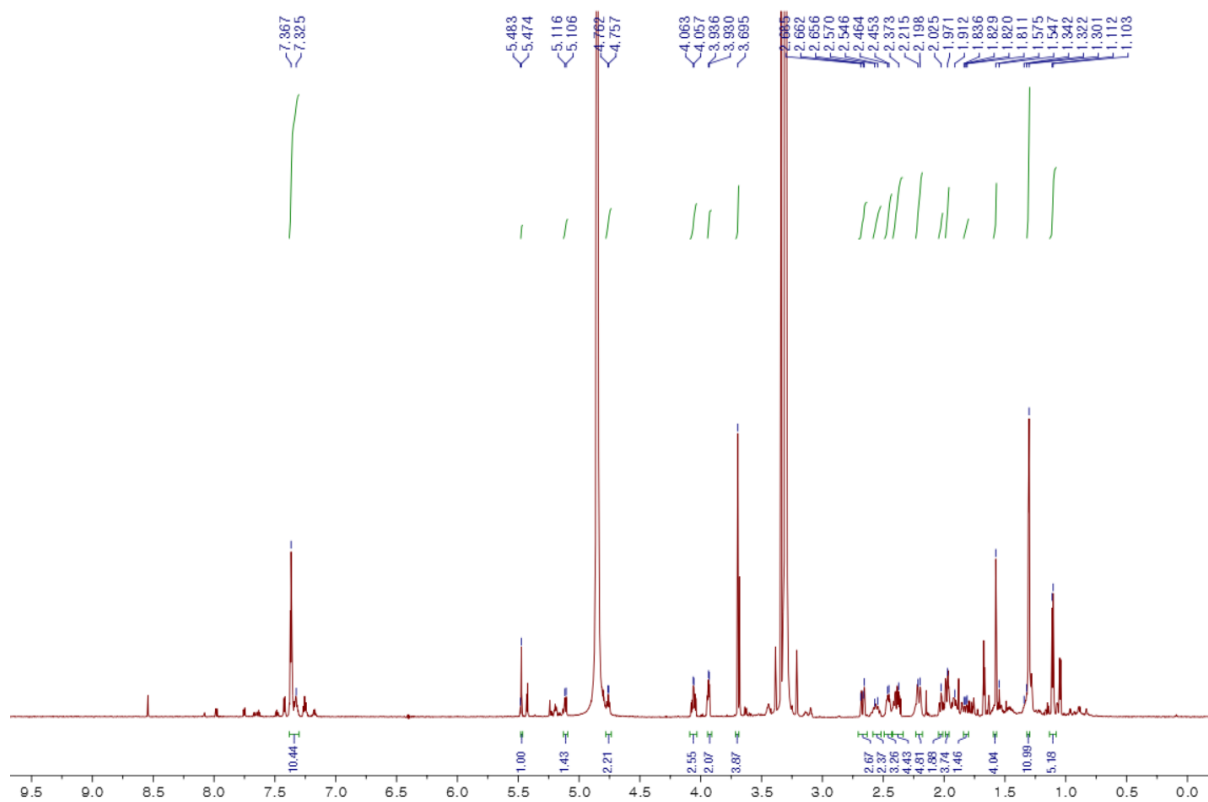

**Figure S53.** The  $^1\text{H}$  NMR spectrum of (*R*)-PGME Amide of **8** (800MHz,  $\text{CD}_3\text{OD}$ )



Please select version of database to use:

DP4-original  
**DP4-database2**

Select probability distribution:

t distribution (recommended)  
 normal distribution

**13C Calc:**

C1,C2,C3,C4,C4A,C5,C6,C7,C8,C8A,C9,C9A,C10,  
 112.2,157.0,131.8,135.6,127.9,154.9,146.1,128.4,1  
 112.1,157.1,131.9,135.7,127.5,154.5,146.3,128.4,1

**1H Calc:**

H1,H4,H7,H11,H11A,H11B,H12,H12A,H12B,H1',H2  
 7.6,8.6,7.3,2.6,2.6,2.4,3.3,3.8,3.6,5.0,3.6,4.7,7.5,1.8  
 7.6,8.6,7.3,2.5,2.6,2.5,3.8,3.2,3.6,5.0,3.6,4.7,7.4,1.9

**13C Expt:**

111.7(C1), 164.0(C2), 133.8(C3), 131.2(C4), 126.8

**1H Expt:**

7.51(H1), 7.65(H4), 6.78(H7), 2.23(H11), 2.23(H11)

**Read Data** **Show Assignments** **Calculate** **Clear**

Results of DP4 using both carbon and proton data:  
 Isomer 1: 2.7%  
 Isomer 2: 97.3%

Results of DP4 using the carbon data only:  
 Isomer 1: 11.1%  
 Isomer 2: 88.9%

Results of DP4 using the proton data only:  
 Isomer 1: 18.0%  
 Isomer 2: 82.0%

(c) Jonathan M Goodman and Steven G Smith

**Figure S54.** The results of DP4 analyses of Alterporriol Z1 (1)

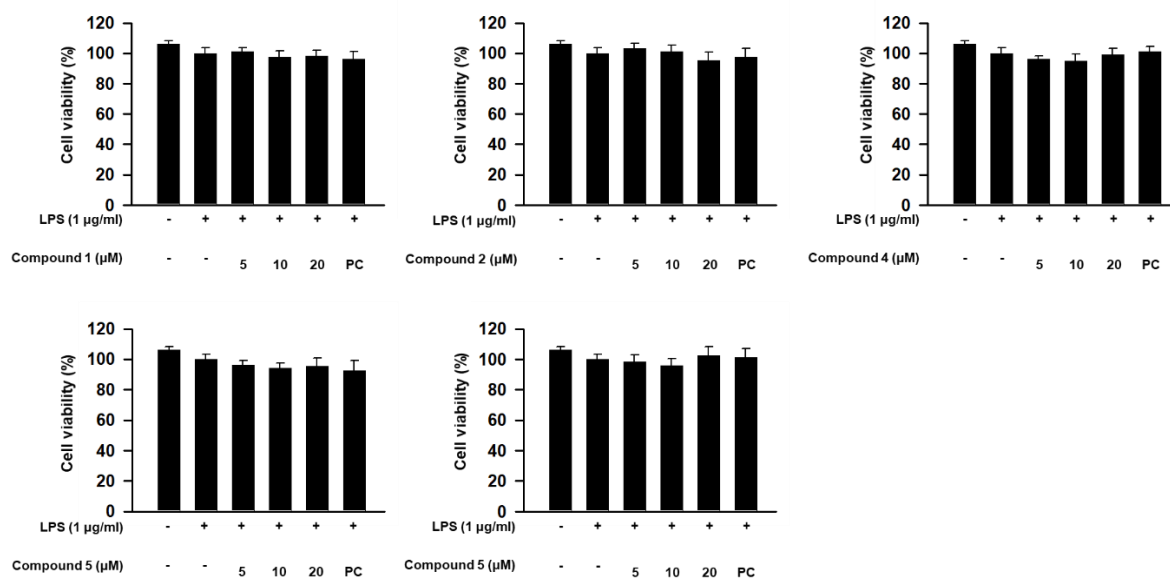

**Figure S55.** The viability of RAW 264.7 cells was measured using the MTT assay

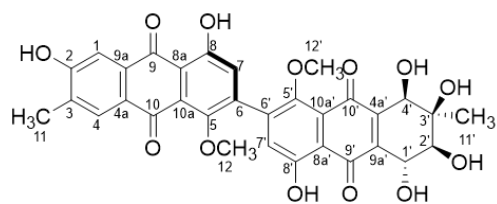

aR,1'R,2'S,3'R,4'R

[Isomer 1]

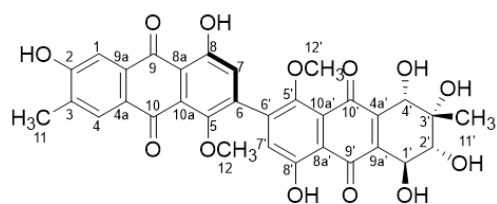

aR,1'S,2'R,3'S,4'S

[Isomer 2]

| No.  | Aterporriol Z1        |               | No.  | Isomer 1 |             | No.  | Isomer 2 |             |
|------|-----------------------|---------------|------|----------|-------------|------|----------|-------------|
| 1    | 111.7, CH             | 7.51, d (0.5) | 1    | 112.2    | 7.6         | 1    | 112.1    | 7.6         |
| 2    | 164.0, C              |               | 2    | 157.0    |             | 2    | 157.1    |             |
| 3    | 133.8, C              |               | 3    | 131.8    |             | 3    | 131.9    |             |
| 4    | 131.2, CH             | 7.65, d (0.5) | 4    | 135.6    | 8.6         | 4    | 135.7    | 8.6         |
| 4a   | 126.8, C              |               | 4a   | 127.9    |             | 4a   | 127.5    |             |
| 5    | 165.8, C              |               | 5    | 154.9    |             | 5    | 154.5    |             |
| 6    | 125.3, C              |               | 6    | 146.1    |             | 6    | 146.3    |             |
| 7    | 104.6, CH             | 6.78, s       | 7    | 128.4    | 7.3         | 7    | 128.4    | 7.3         |
| 8    | 166.9, C              |               | 8    | 157.7    |             | 8    | 158.1    |             |
| 8a   | 111.9, C              |               | 8a   | 117.4    |             | 8a   | 116.9    |             |
| 9    | 188.7, C              |               | 9    | 187.1    |             | 9    | 187.2    |             |
| 9a   | 134.7, C              |               | 9a   | 132.0    |             | 9a   | 131.9    |             |
| 10   | 183.5, C              |               | 10   | 182.7    |             | 10   | 182.7    |             |
| 10a  | 133.4, C              |               | 10a  | 124.9    |             | 10a  | 124.1    |             |
| 11   | 16.6, CH <sub>3</sub> | 2.23, s       | 11   | 20.6     | 2.6,2.6,2.4 | 11   | 20.6     | 2.5,2.6,2.5 |
| 12   | 56.9, CH <sub>3</sub> | 3.69, s       | 12   | 61.7     | 3.3,3.8,3.6 | 12   | 61.8     | 3.8,3.2,3.6 |
| 1'   | 70.6, CH              | 4.73, d (7.5) | 1'   | 75.0     | 5.0         | 1'   | 75.1     | 5.0         |
| 2'   | 75.2, CH              | 3.79, d (7.5) | 2'   | 84.6     | 3.6         | 2'   | 82.6     | 3.6         |
| 3'   | 74.6, C               |               | 3'   | 77.6     |             | 3'   | 77.6     |             |
| 4'   | 70.1, CH              | 4.26, s       | 4'   | 76.0     | 4.7         | 4'   | 76.1     | 4.7         |
| 4a'  | 143.8, C              |               | 4a'  | 141.2    |             | 4a'  | 141.1    |             |
| 5'   | 166.3, C              |               | 5'   | 156.4    |             | 5'   | 156.9    |             |
| 6'   | 123.4, C              |               | 6'   | 146.1    |             | 6'   | 146.6    |             |
| 7'   | 104.6, CH             | 6.81, s       | 7'   | 130.0    | 7.5         | 7'   | 129.5    | 7.4         |
| 8'   | 166.1, C              |               | 8'   | 156.8    |             | 8'   | 157.1    |             |
| 8a'  | 111.0, C              |               | 8a'  | 116.3    |             | 8a'  | 116.2    |             |
| 9'   | 190.5, C              |               | 9'   | 188.6    |             | 9'   | 189.4    |             |
| 9a'  | 143.9, C              |               | 9a'  | 143.4    |             | 9a'  | 143.4    |             |
| 10'  | 185.7, C              |               | 10'  | 187.8    |             | 10'  | 187.8    |             |
| 10a' | 130.8, C              |               | 10a' | 124.0    |             | 10a' | 123.5    |             |
| 11'  | 22.3, CH <sub>3</sub> | 1.33, s       | 11'  | 25.9     | 1.8,0.9,1.9 | 11'  | 26.7     | 1.9,0.9,1.7 |
| 12'  | 57.0, CH <sub>3</sub> | 3.70, s       | 12'  | 61.4     | 3.5,4.0,3.4 | 12'  | 61.1     | 4.0,3.6,3.4 |

**Table S1.** Experimental (Exp.) and calculated (Cal.) chemical shift values of enantiomers A and B on aliphatic ring part of Alterporriol Z1 (**1**)

| No.                           | <b>1</b> <sup>a</sup> |
|-------------------------------|-----------------------|
| $\delta_{\text{H}}$ (J in Hz) |                       |
| 1                             | 7.52, s               |
| 2                             |                       |
| 3                             |                       |
| 4                             | 7.70, s               |
| 4a                            |                       |
| 5                             |                       |
| 6                             |                       |
| 7                             | 6.78, s               |
| 8                             |                       |
| 8a                            |                       |
| 9                             |                       |
| 9a                            |                       |
| 10                            |                       |
| 10a                           |                       |
| 11                            | 2.23, s               |
| 12                            | 3.68, s               |
| 1'                            | 4.64, d (7.0)         |
| 2'                            | 3.70, d (7.0)         |
| 3'                            |                       |
| 4'                            | 4.12, d (6.0)         |
| 4a'                           |                       |
| 5'                            |                       |
| 6'                            |                       |
| 7'                            | 6.78, s               |
| 8'                            |                       |
| 8a'                           |                       |
| 9'                            |                       |
| 9a'                           |                       |
| 10'                           |                       |
| 10a'                          |                       |
| 11'                           | 1.26, s               |
| 12'                           | 3.69, s               |
| 13'                           |                       |
| 1' OH                         | 4.29, br. s           |
| 2' OH                         | 4.22, br. s           |
| 3' OH                         | 3.78, s               |
| 4' OH                         | 4.70, d (6.0)         |

<sup>a</sup> Measured at 800 MHz for <sup>1</sup>H NMR

**Table S2.** The <sup>1</sup>H NMR Data of Alterporriol Z1 (**1**) in THF-*d*<sub>8</sub>
